# Supplementary material for: Identification of drug modifiers for RYR1-related myopathy using a multi-species discovery pipeline
Source: eLife journal article supplement (doi:10.7554/elife.52946), 2020-03-30
Supplement: supp [file elife-52946-supp-v1.zip]

Archive with 17 entries (17 files):
- elife_poa_e52946_Figure_2_figure_supplement_1.png
- elife_poa_e52946_Figure_5_figure_supplement_1.png
- elife_poa_e52946_Supplementary_file_1.xlsx
- elife_poa_e52946_Figure_4_figure_supplement_2.png
- elife_poa_e52946_Figure_2_figure_supplement_5.png
- elife_poa_e52946_Figure_3_figure_supplement_1.png
- elife_poa_e52946_Figure_5_figure_supplement_2.png
- elife_poa_e52946_Figure_2_figure_supplement_4.png
- elife_poa_e52946_Figure_5_figure_supplement_3.png
- elife_poa_e52946_Figure_2_figure_supplement_3.png
- elife_poa_e52946_Figure_2_figure_supplement_2.png
- elife_poa_e52946_Figure_4_figure_supplement_1.png
- elife_poa_e52946_Source_data_1.zip
- elife_poa_e52946_Figure_5_figure_supplement_4.png
- elife_poa_e52946_Figure_4_figure_supplement_3.png
- elife_poa_e52946_Supplementary_file_2.xlsx
- elife_poa_e52946_Transparent_Reporting_File.pdf
