# Supplementary material for: Identification of drug modifiers for RYR1-related myopathy using a multi-species discovery pipeline
Source: eLife journal article supplement (doi:10.7554/elife.52946), 2020-03-30
Supplement: supp [file elife-52946-supp-v1.zip › elife_poa_e52946_Supplementary_file_1.xlsx]

## Sheet: Sheet1
Supplementary File 1. List of 74 chemicals that suppressed the synthetic, nemadipine-induced unc-68 growth arrest.
Chemical Category	Name	Primary Target/Function	Chembridge ID:	Reference
Wactives	Wact-526	Uncharacterized	7708417	Burns et al., 2015
Wactives	Wact-405	Uncharacterized	5344994	Burns et al., 2015
Wactives	Wact-354	Uncharacterized	No longer commercially available	Burns et al., 2015
Wactives	Wact-488	Uncharacterized	6848756	Burns et al., 2015
Wactives	Wact-620	Uncharacterized	5245497	Burns et al., 2015
Non-wactives	Rand-103	Uncharacterized	7781362	Burns et al., 2015
Non-wactives	Rand-97	Uncharacterized	9042750	Burns et al., 2015
Non-wactives	Rand-62	Uncharacterized	5659673	Burns et al., 2015
Non-wactives	Rand-33	Uncharacterized	7657959	Burns et al., 2015
Non-wactives	Rand-48	Uncharacterized	5326088	Burns et al., 2015
Non-wactives	Rand-122	Uncharacterized	51875363	Burns et al., 2015
Non-wactives	Rand-100	Uncharacterized	82804962	Burns et al., 2015
MicroSource US Drug Collection	Nonoxynol-9	Surfactant; spermatocide, contraceptive	N/A	N/A
MicroSource US Drug Collection	Tyloxapol	Surfactant; polymeric nonionic detergent	N/A	N/A
MicroSource US Drug Collection	Thiostrepton	Antibacterial	N/A	N/A
MicroSource US Drug Collection	Riboflavin	Vitamin B2, enzyme cofactor	N/A	N/A
MicroSource US Drug Collection	Hydroxyprogesterone Caproate	Steroid hormone; progestogen	N/A	N/A
MicroSource US Drug Collection	Octisalate	Benzophenone derivative; sunscreen	N/A	N/A
MicroSource US Drug Collection	Anthralin	Anthracene derivative; antipsoriatic	N/A	N/A
MicroSource US Drug Collection	Avobenzone	Benzophenone derivative; sunscreen	N/A	N/A
MicroSource US Drug Collection	Nicardipine Hydrochloride	DHPR antagonist; vasodilator	N/A	N/A
MicroSource US Drug Collection	Riboflavin 5-Phosphate Sodium	Vitamin B2, enzyme cofactor	N/A	N/A
MicroSource US Drug Collection	Prednicarbate	Steroid hormone; antiinflammatory, glucocorticoid	N/A	N/A
MicroSource US Drug Collection	Oxybenzone	Benzophenone derivative; sunscreen	N/A	N/A
MicroSource US Drug Collection	Medroxyprogesterone Acetate	Steroid hormone; progestogen, contraceptive	N/A	N/A
MicroSource US Drug Collection	Drospirenone	Steroid hormone; aldosterone antagonist	N/A	N/A
MicroSource US Drug Collection	Dabigatran Etexilate Mesylate	Antithrombotic, serine protease inhibitor	N/A	N/A
MicroSource US Drug Collection	Felodipine	DHPR antagonist; vasodilator	N/A	N/A
MicroSource US Drug Collection	Loratadine	Tricyclic antihistamine, H1 antihistamine	N/A	N/A
MicroSource US Drug Collection	Ergotamine Tartrate	Ergot alkaloid; analgesic, antimigraine	N/A	N/A
Kinase Inhibitor Library	GW468513X	p38	N/A	DOI: 10.1021/ol0519745
Kinase Inhibitor Library	GSK2634140A	PERK	N/A	N/A
Kinase Inhibitor Library	GSK2347225A	PI3K	N/A	N/A
Kinase Inhibitor Library	GW702865X	p38 alpha	N/A	DOI: 10.1016/j.bmcl.2007.10.043
Kinase Inhibitor Library	SB-708998	GSK3	N/A	N/A
Kinase Inhibitor Library	GSK1030058A	PLK1	N/A	N/A
Kinase Inhibitor Library	SB-693162	p70S6K	N/A	N/A
Kinase Inhibitor Library	GW461487A	p38	N/A	DOI: 10.1021/ol0519745
Kinase Inhibitor Library	SB-734909	GSK3	N/A	N/A
Kinase Inhibitor Library	GW810372X	GSK	N/A	DOI: 10.1021/jm040063i
Kinase Inhibitor Library	GSK317314A	PLK1	N/A	N/A
Kinase Inhibitor Library	GW633459A	EGFR	N/A	DOI: 10.1016/j.bcp.2012.02.028
Kinase Inhibitor Library	GSK2645446A	PERK	N/A	N/A
Kinase Inhibitor Library	GSK2299009A	PI3K	N/A	N/A
Kinase Inhibitor Library	GI230329A	EGFR	N/A	DOI: 10.1021/jm050607w
Kinase Inhibitor Library	GW680903X	VEGFR/TIE-2	N/A	DOI: 10.1021/jm0611051
Kinase Inhibitor Library	GW807930X	EGFR	N/A	DOI: 10.1016/j.bmcl.2006.01.111
Kinase Inhibitor Library	SB-341528	GSK3	N/A	N/A
Kinase Inhibitor Library	GW651576X	EGFR	N/A	DOI: 10.1016/j.bmcl.2006.01.111
Kinase Inhibitor Library	GW827106X	GSK3	N/A	N/A
Kinase Inhibitor Library	GSK2635225A	PERK	N/A	N/A
Kinase Inhibitor Library	GSK479719A	PLK1	N/A	N/A
Kinase Inhibitor Library	GW549034X	p70S6K	N/A	DOI: 10.1016/j.bmcl.2009.07.022
Kinase Inhibitor Library	GW561436X	p38	N/A	DOI: 10.1021/ol0519745
Kinase Inhibitor Library	GSK1023156A	PLK1	N/A	N/A
Kinase Inhibitor Library	SB-625086-M	B-Raf	N/A	DOI: 10.1016/j.bmcl.2005.09.072
Kinase Inhibitor Library	GW630813X	p38	N/A	DOI: 10.1021/ol0519745
Kinase Inhibitor Library	GSK507358A	ROCK1	N/A	DOI: 10.1016/j.bmcl.2009.11.064
Kinase Inhibitor Library	GSK317315A	PLK1	N/A	N/A
Kinase Inhibitor Library	GSK586581A	IKK alpha and beta	N/A	DOI: 10.1016/j.bmcl.2007.04.088
Kinase Inhibitor Library	GSK1669917A	Unknown function	N/A	N/A
Kinase Inhibitor Library	GW569293E	p38	N/A	DOI: 10.1021/ol0519745
Kinase Inhibitor Library	GW782912X	p38 alpha	N/A	DOI: 10.1016/j.bmcl.2008.06.048
Kinase Inhibitor Library	GW828205X	GSK3	N/A	N/A
Kinase Inhibitor Library	SB-408010	GSK3	N/A	N/A
Kinase Inhibitor Library	SB-735464	GSK3	N/A	N/A
Kinase Inhibitor Library	GW599550X	TGFbeta/ALK5	N/A	DOI: 10.1021/jm0509905
Kinase Inhibitor Library	GSK2334006A	PI3K	N/A	N/A
Kinase Inhibitor Library	GW828206X	GSK3	N/A	N/A
Kinase Inhibitor Library	GSK980961A	IKKbeta	N/A	DOI: 10.1021/jm9000117
Kinase Inhibitor Library	GW621823A	EGFR	N/A	DOI: 10.1016/j.bcp.2012.02.028
Kinase Inhibitor Library	GW424170A	EGFR	N/A	N/A
Kinase Inhibitor Library	SB-610250	B-Raf	N/A	DOI: 10.1016/j.bmcl.2005.09.072
Kinase Inhibitor Library	GW271431X	TGFbeta/ALK5	N/A	DOI: 10.1021/jm301144g
