# Supplementary material for: Identification of drug modifiers for RYR1-related myopathy using a multi-species discovery pipeline
Source: eLife journal article supplement (doi:10.7554/elife.52946), 2020-03-30
Supplement: supp [file elife-52946-supp-v1.zip › elife_poa_e52946_Supplementary_file_2.xlsx]

## Sheet: Sheet1
Supplementary File 2. List of individual chemicals used in this study. This list does not include all of the chemicals present in the chemical libraries screened.
Chemical Category	Name	Chembridge ID:	CAS #
Kinase Inhibitors	GDC-0941	N/A	957054-30-7
Kinase Inhibitors	SB203580	N/A	152121-47-6
Kinase Inhibitors	SB202190	N/A	152121-30-7
Kinase Inhibitors	SB239063	N/A	193551-21-2
Kinase Inhibitors	PH-797804	N/A	586379-66-0
Kinase Inhibitors	SB-415286	N/A	264218-23-7
Kinase Inhibitors	CHIR-9902	N/A	252917-06-9
Kinase Inhibitors	GSK2656157	N/A	1337532-29-2
Kinase Inhibitors	Erlotinib	N/A	183321-74-6
Kinase Inhibitors	PD169316	N/A	152121-53-4
Kinase Inhibitors	PI-103	N/A	371935-74-9
Kinase Inhibitors	AZD6482	N/A	1173900-33-8
Kinase Inhibitors	BKM120	N/A	944396-07-0
Kinase Inhibitors	NMS-1286937	N/A	1034616-18-6
Wactives	Wact-526	7708417	N/A
Wactives	Wact-405	5344994	N/A
Wactives	Wact-354	No longer commercially available	N/A
Wactives	Wact-488	6848756	N/A
Wactives	Wact-620	5245497	N/A
Non-wactives	Rand-103	7781362	N/A
Non-wactives	Rand-97	9042750	N/A
Non-wactives	Rand-62	5659673	N/A
Non-wactives	Rand-33	7657959	N/A
Non-wactives	Rand-48	5326088	N/A
Non-wactives	Rand-122	51875363	N/A
Non-wactives	Rand-100	82804962	N/A
MicroSource US Drug Collection	Nonoxynol-9	N/A	26027-38-3
MicroSource US Drug Collection	Tyloxapol	N/A	25301-02-4
MicroSource US Drug Collection	Thiostrepton	N/A	1393-48-2
MicroSource US Drug Collection	Riboflavin	N/A	83-88-5
MicroSource US Drug Collection	Hydroxyprogesterone Caproate	N/A	630-56-8
MicroSource US Drug Collection	Octisalate	N/A	118-60-5
MicroSource US Drug Collection	Anthralin	N/A	1143-38-0
MicroSource US Drug Collection	Avobenzone	N/A	70356-09-1
MicroSource US Drug Collection	Nicardipine Hydrochloride	N/A	55985-32-5
MicroSource US Drug Collection	Riboflavin 5-Phosphate Sodium	N/A	6184-17-4
MicroSource US Drug Collection	Prednicarbate	N/A	73771-04-7
MicroSource US Drug Collection	Oxybenzone	N/A	131-57-7
MicroSource US Drug Collection	Medroxyprogesterone Acetate	N/A	71-58-9
MicroSource US Drug Collection	Drospirenone	N/A	67392-87-4
MicroSource US Drug Collection	Dabigatran Etexilate Mesylate	N/A	872728-81-9
MicroSource US Drug Collection	Felodipine	N/A	72509-76-3
MicroSource US Drug Collection	Loratadine	N/A	79794-75-5
MicroSource US Drug Collection	Ergotamine Tartrate	N/A	379-79-3
Kinase Inhibitor Library	GW468513X	N/A	N/A
Kinase Inhibitor Library	GSK2634140A	N/A	N/A
Kinase Inhibitor Library	GSK2347225A	N/A	N/A
Kinase Inhibitor Library	GW702865X	N/A	N/A
Kinase Inhibitor Library	SB-708998	N/A	N/A
Kinase Inhibitor Library	GSK1030058A	N/A	N/A
Kinase Inhibitor Library	SB-693162	N/A	N/A
Kinase Inhibitor Library	GW461487A	N/A	N/A
Kinase Inhibitor Library	SB-734909	N/A	N/A
Kinase Inhibitor Library	GW810372X	N/A	N/A
Kinase Inhibitor Library	GSK317314A	N/A	N/A
Kinase Inhibitor Library	GW633459A	N/A	N/A
Kinase Inhibitor Library	GSK2645446A	N/A	N/A
Kinase Inhibitor Library	GSK2299009A	N/A	N/A
Kinase Inhibitor Library	GI230329A	N/A	N/A
Kinase Inhibitor Library	GW680903X	N/A	N/A
Kinase Inhibitor Library	GW807930X	N/A	N/A
Kinase Inhibitor Library	SB-341528	N/A	N/A
Kinase Inhibitor Library	GW651576X	N/A	N/A
Kinase Inhibitor Library	GW827106X	N/A	N/A
Kinase Inhibitor Library	GSK2635225A	N/A	N/A
Kinase Inhibitor Library	GSK479719A	N/A	N/A
Kinase Inhibitor Library	GW549034X	N/A	N/A
Kinase Inhibitor Library	GW561436X	N/A	N/A
Kinase Inhibitor Library	GSK1023156A	N/A	N/A
Kinase Inhibitor Library	SB-625086-M	N/A	N/A
Kinase Inhibitor Library	GW630813X	N/A	N/A
Kinase Inhibitor Library	GSK507358A	N/A	N/A
Kinase Inhibitor Library	GSK317315A	N/A	N/A
Kinase Inhibitor Library	GSK586581A	N/A	N/A
Kinase Inhibitor Library	GSK1669917A	N/A	N/A
Kinase Inhibitor Library	GW569293E	N/A	N/A
Kinase Inhibitor Library	GW782912X	N/A	N/A
Kinase Inhibitor Library	GW828205X	N/A	N/A
Kinase Inhibitor Library	SB-408010	N/A	N/A
Kinase Inhibitor Library	SB-735464	N/A	N/A
Kinase Inhibitor Library	GW599550X	N/A	N/A
Kinase Inhibitor Library	GSK2334006A	N/A	N/A
Kinase Inhibitor Library	GW828206X	N/A	N/A
Kinase Inhibitor Library	GSK980961A	N/A	N/A
Kinase Inhibitor Library	GW621823A	N/A	N/A
Kinase Inhibitor Library	GW424170A	N/A	N/A
Kinase Inhibitor Library	SB-610250	N/A	N/A
Kinase Inhibitor Library	GW271431X	N/A	N/A
