# Supplementary figures and images for: Identification of drug modifiers for RYR1-related myopathy using a multi-species discovery pipeline
Source: eLife journal article supplement (doi:10.7554/elife.52946), 2020-03-30

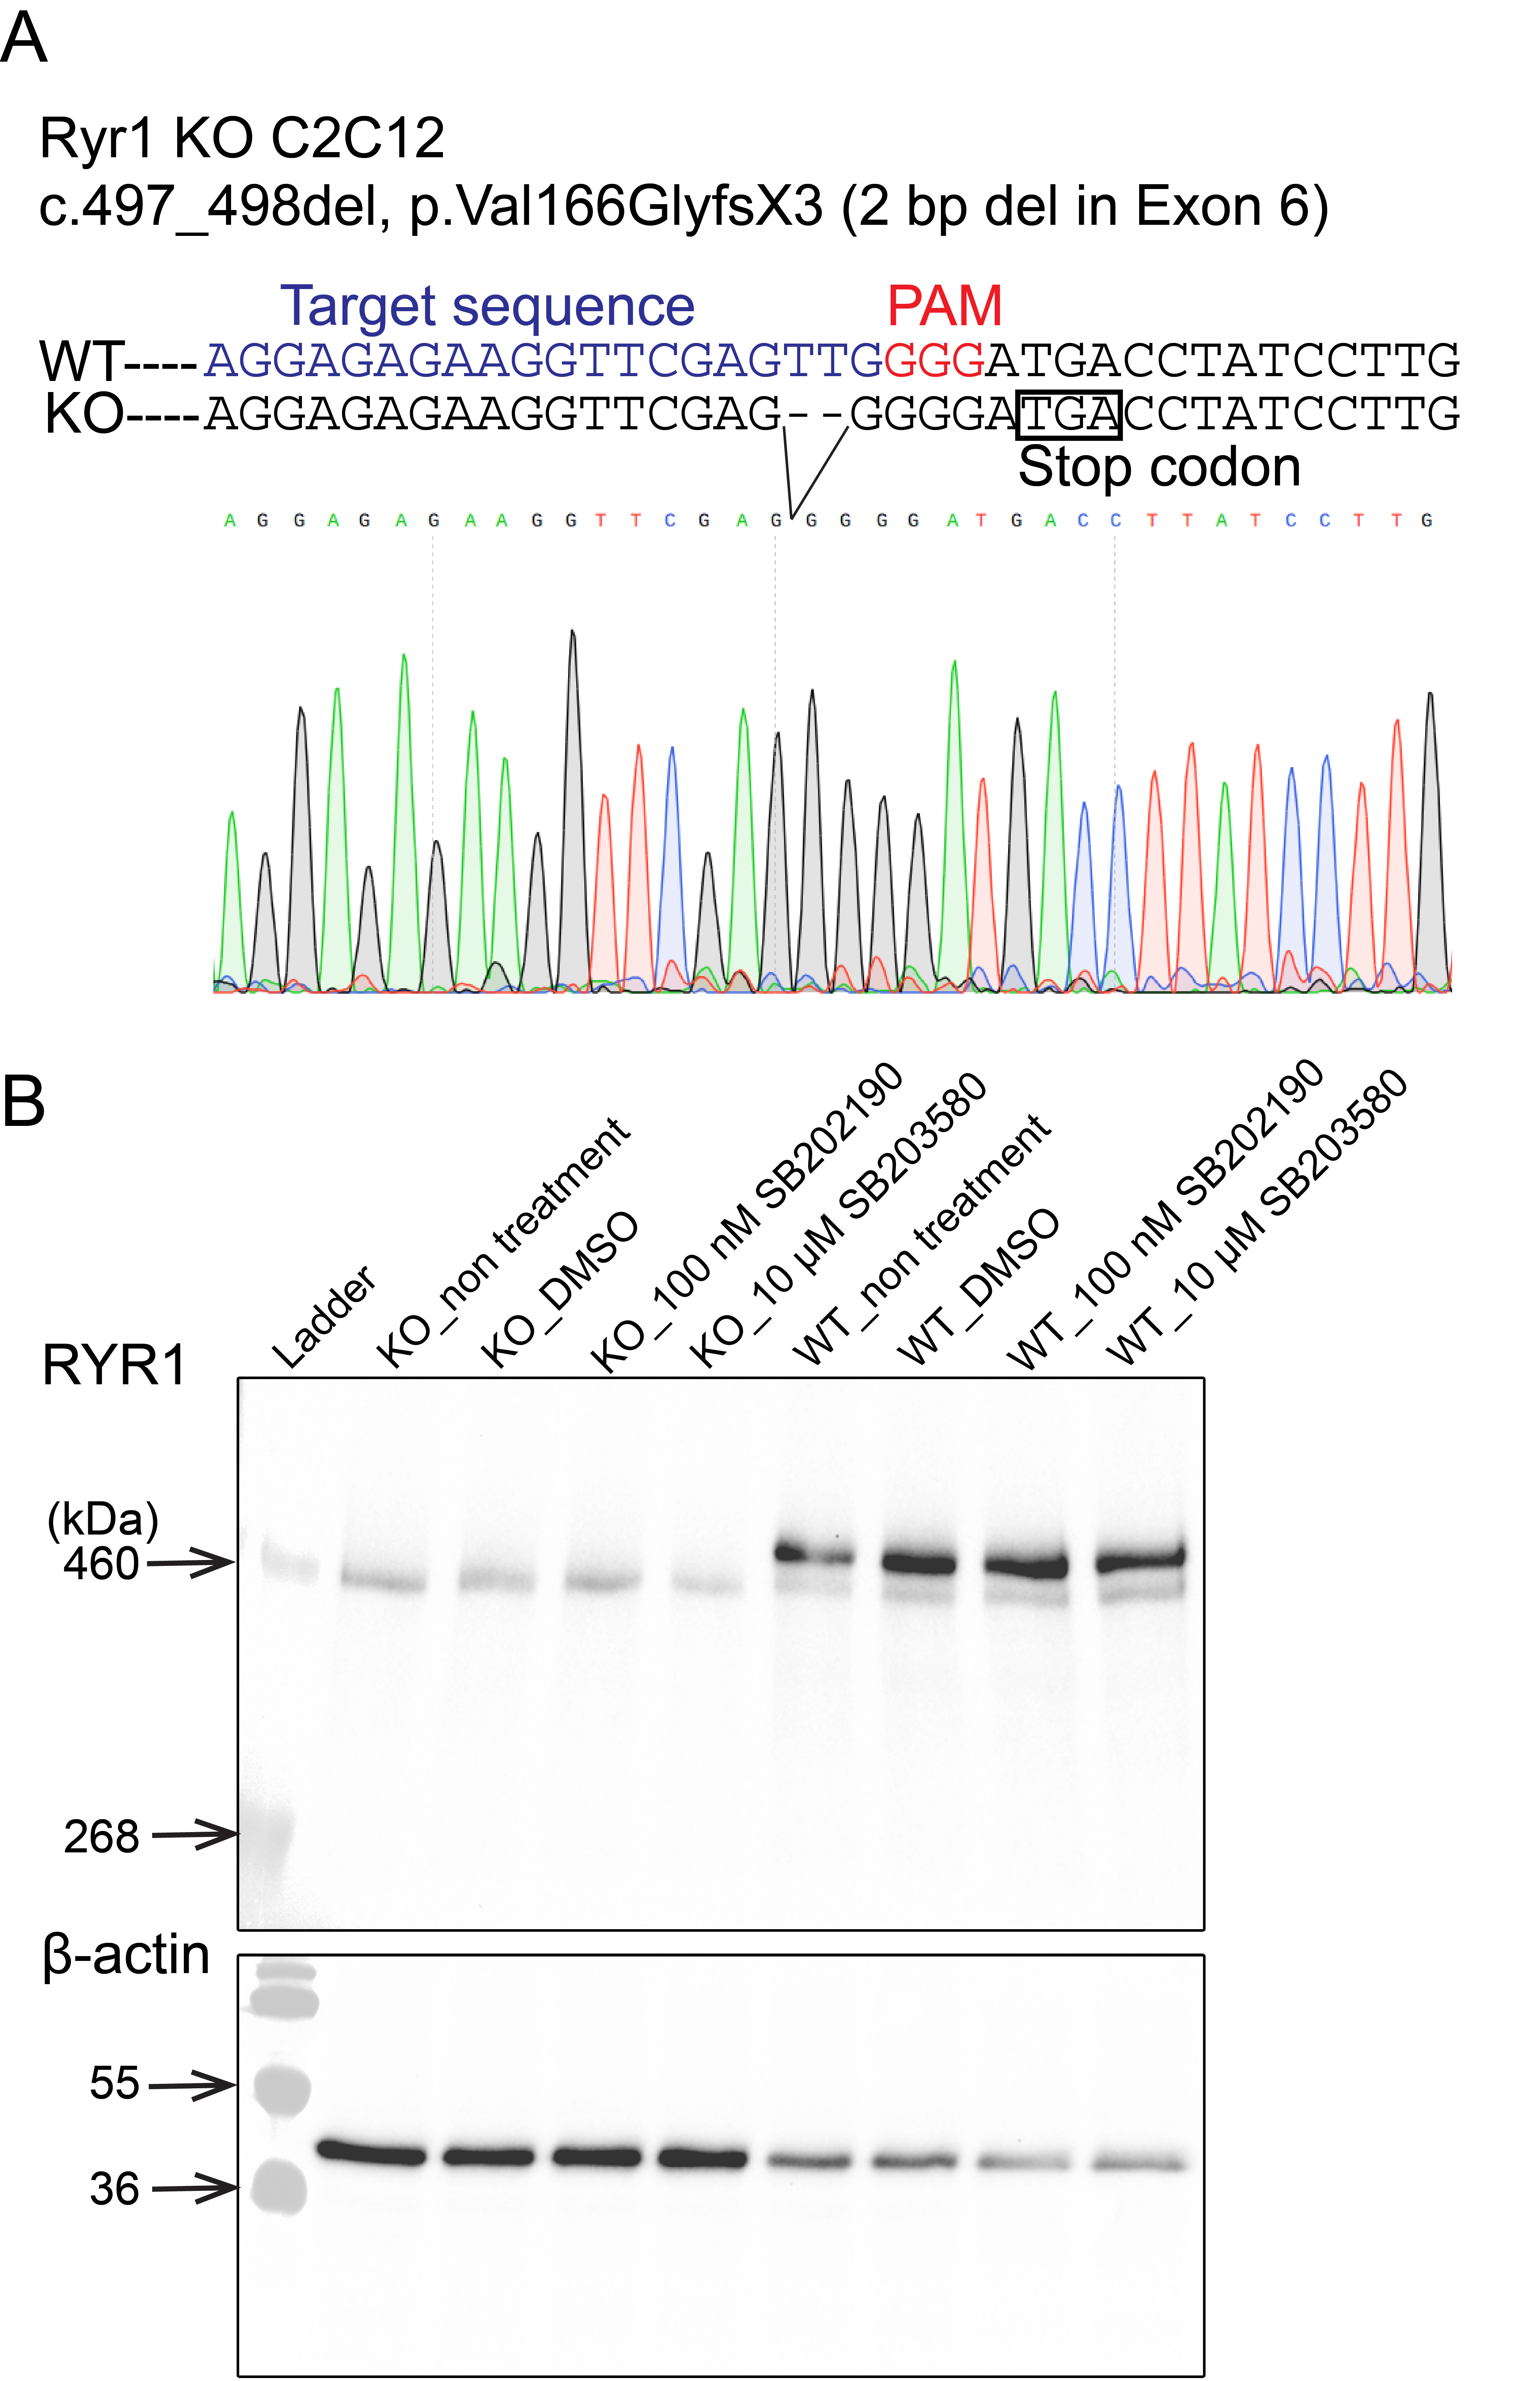

Supplement: supp [file elife-52946-supp-v1.zip › elife_poa_e52946_Figure_5_figure_supplement_1.png]

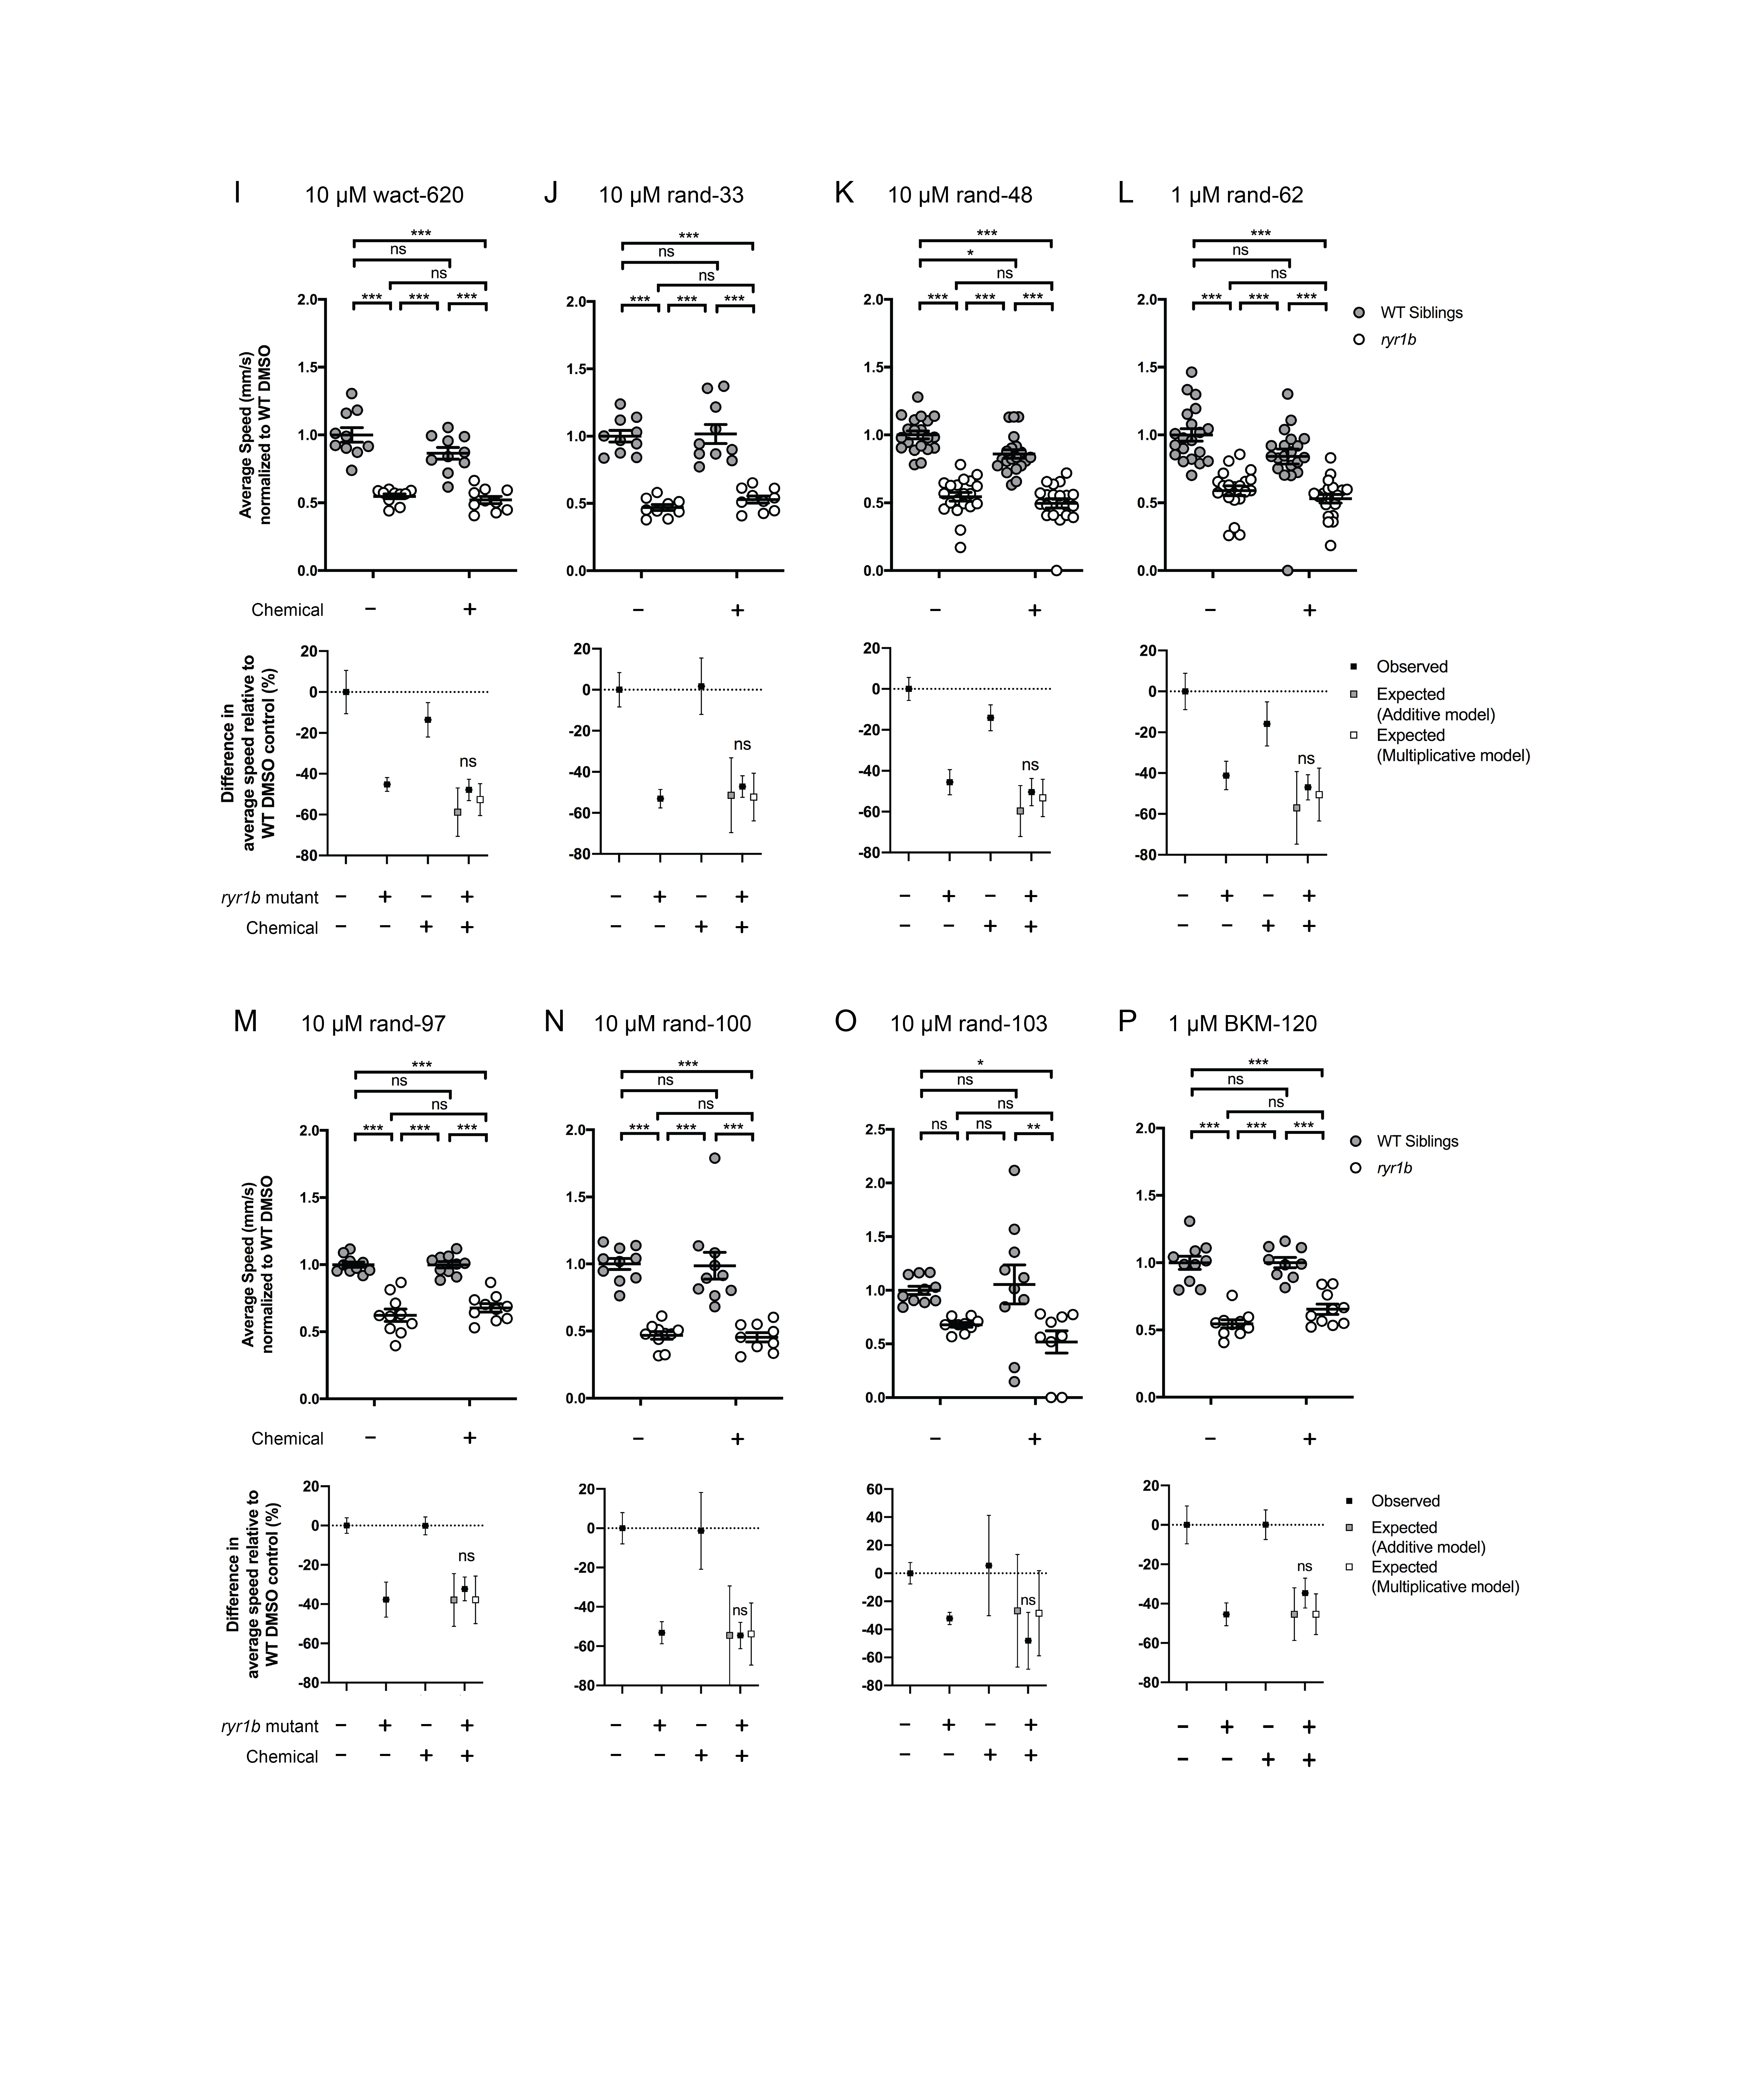

Supplement: supp [file elife-52946-supp-v1.zip › elife_poa_e52946_Figure_4_figure_supplement_2.png]

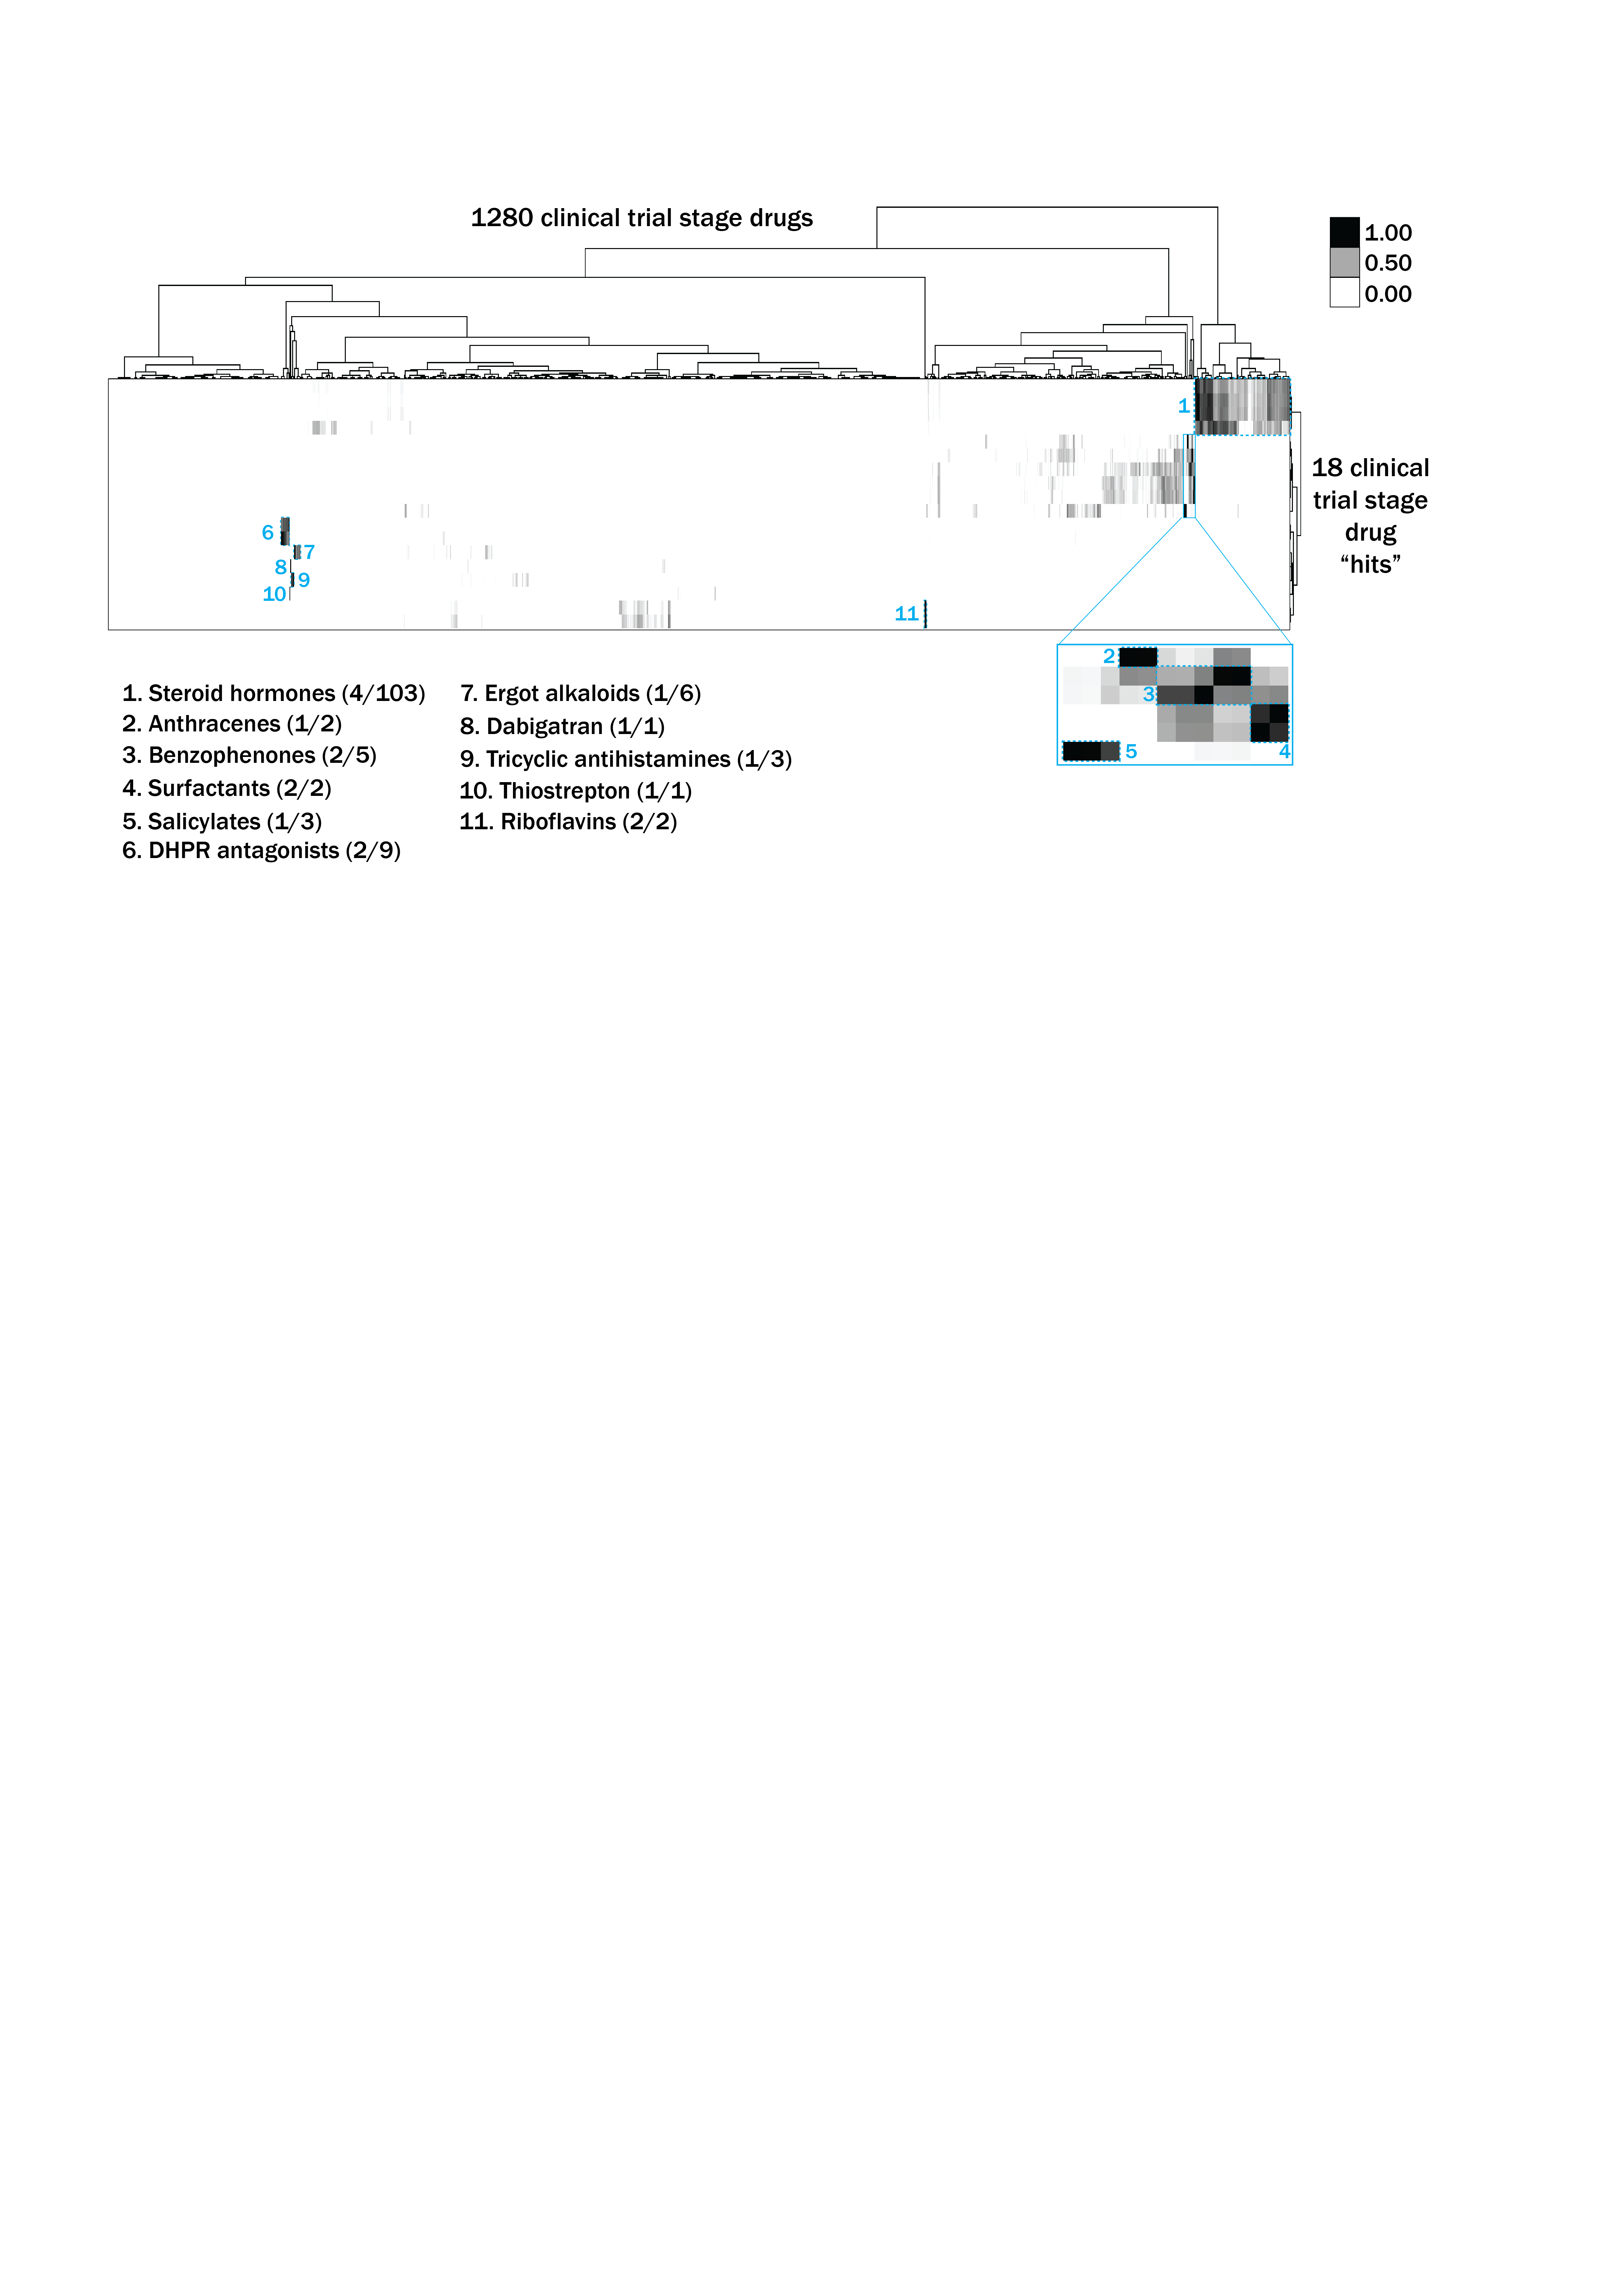

Supplement: supp [file elife-52946-supp-v1.zip › elife_poa_e52946_Figure_2_figure_supplement_5.png]

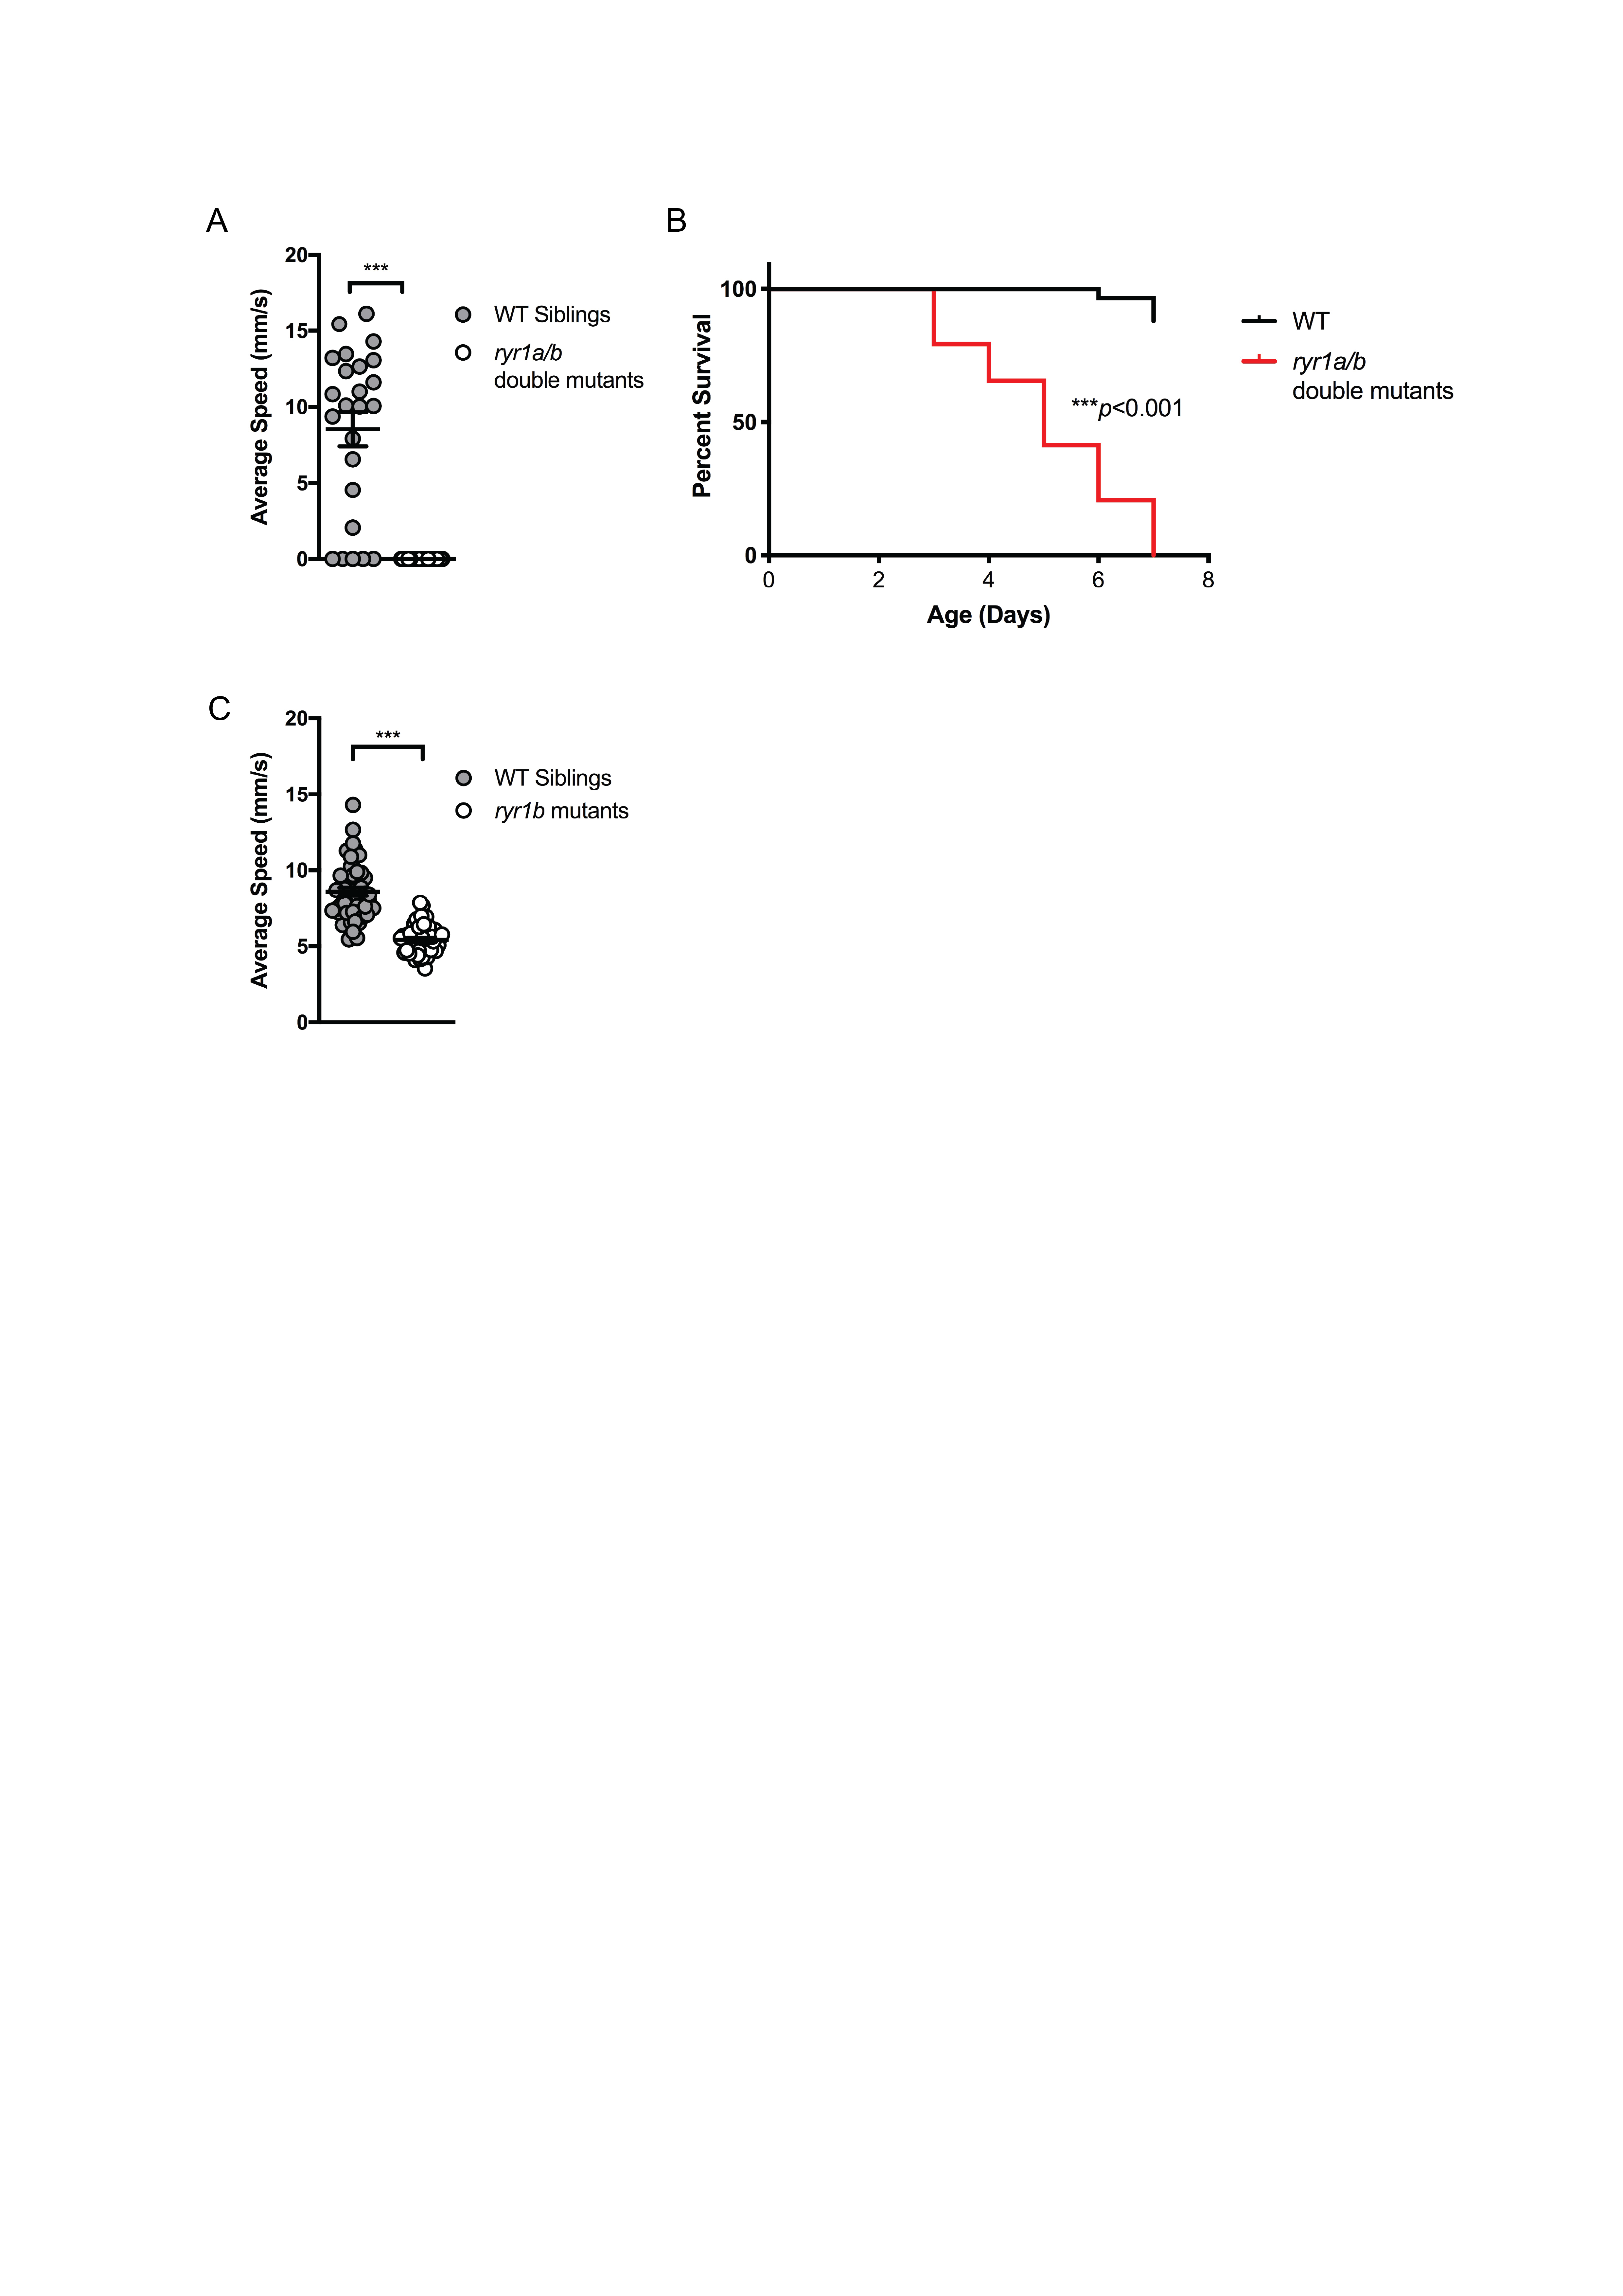

Supplement: supp [file elife-52946-supp-v1.zip › elife_poa_e52946_Figure_3_figure_supplement_1.png]

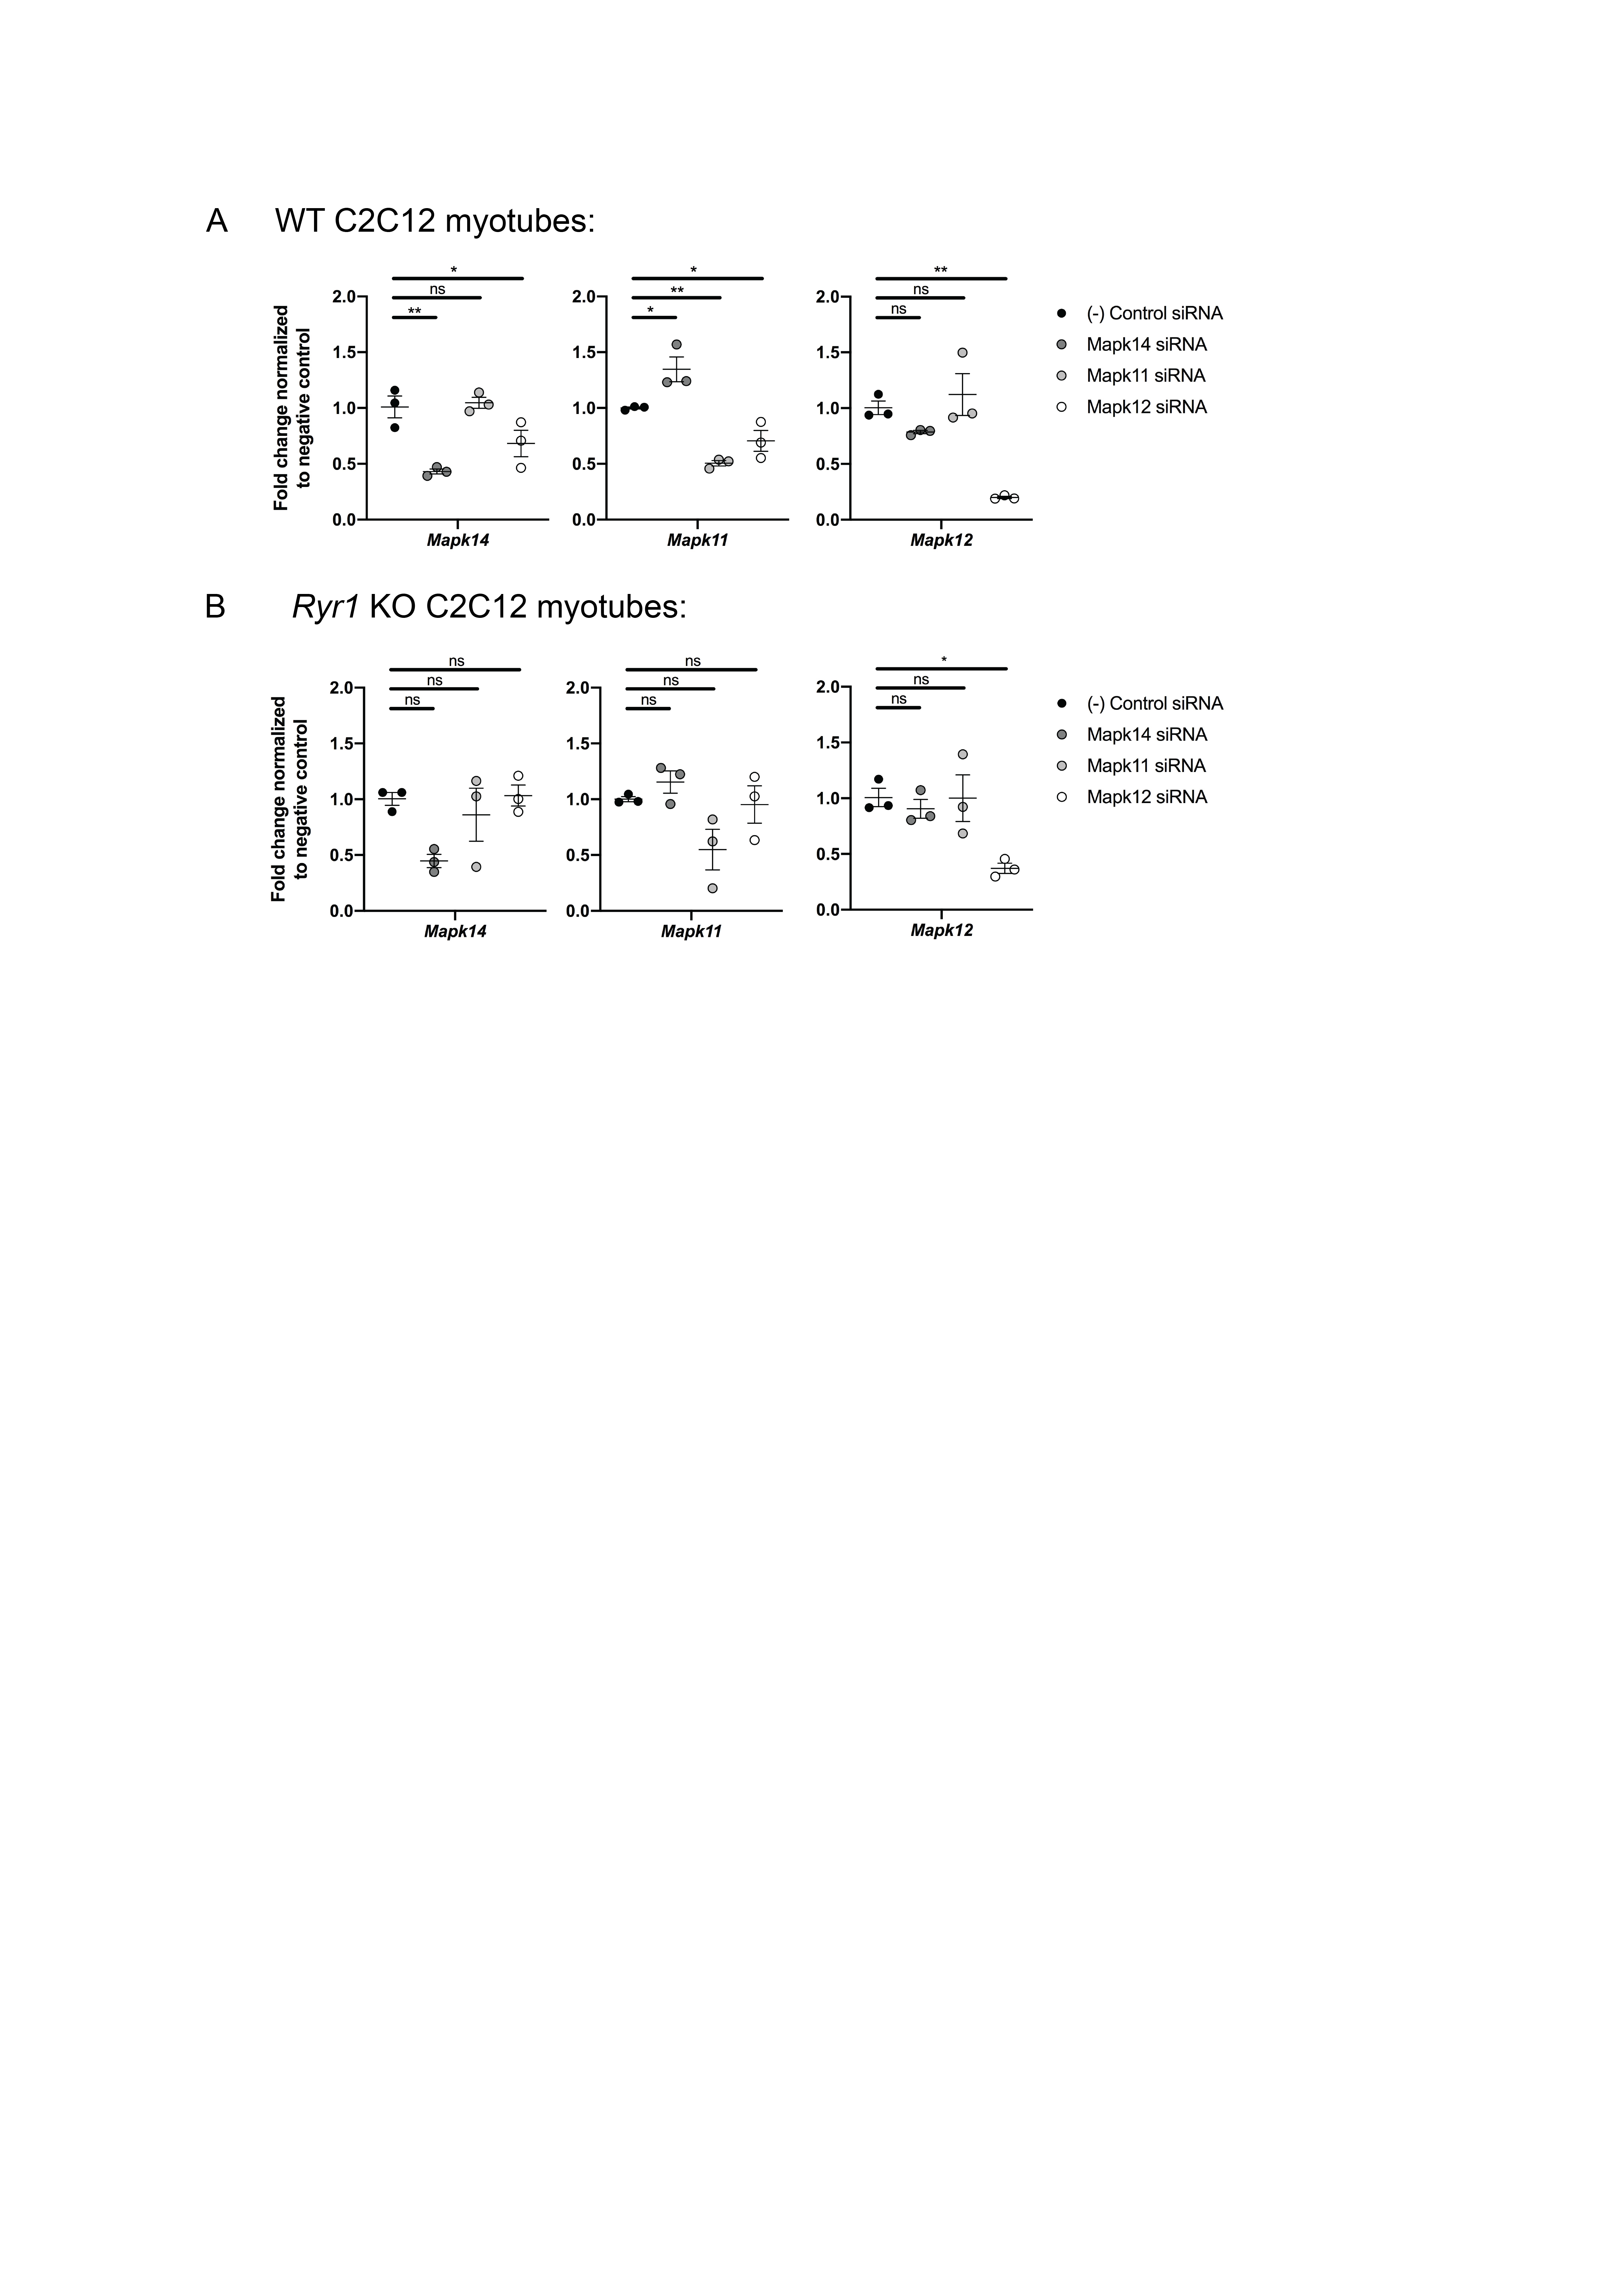

Supplement: supp [file elife-52946-supp-v1.zip › elife_poa_e52946_Figure_5_figure_supplement_2.png]

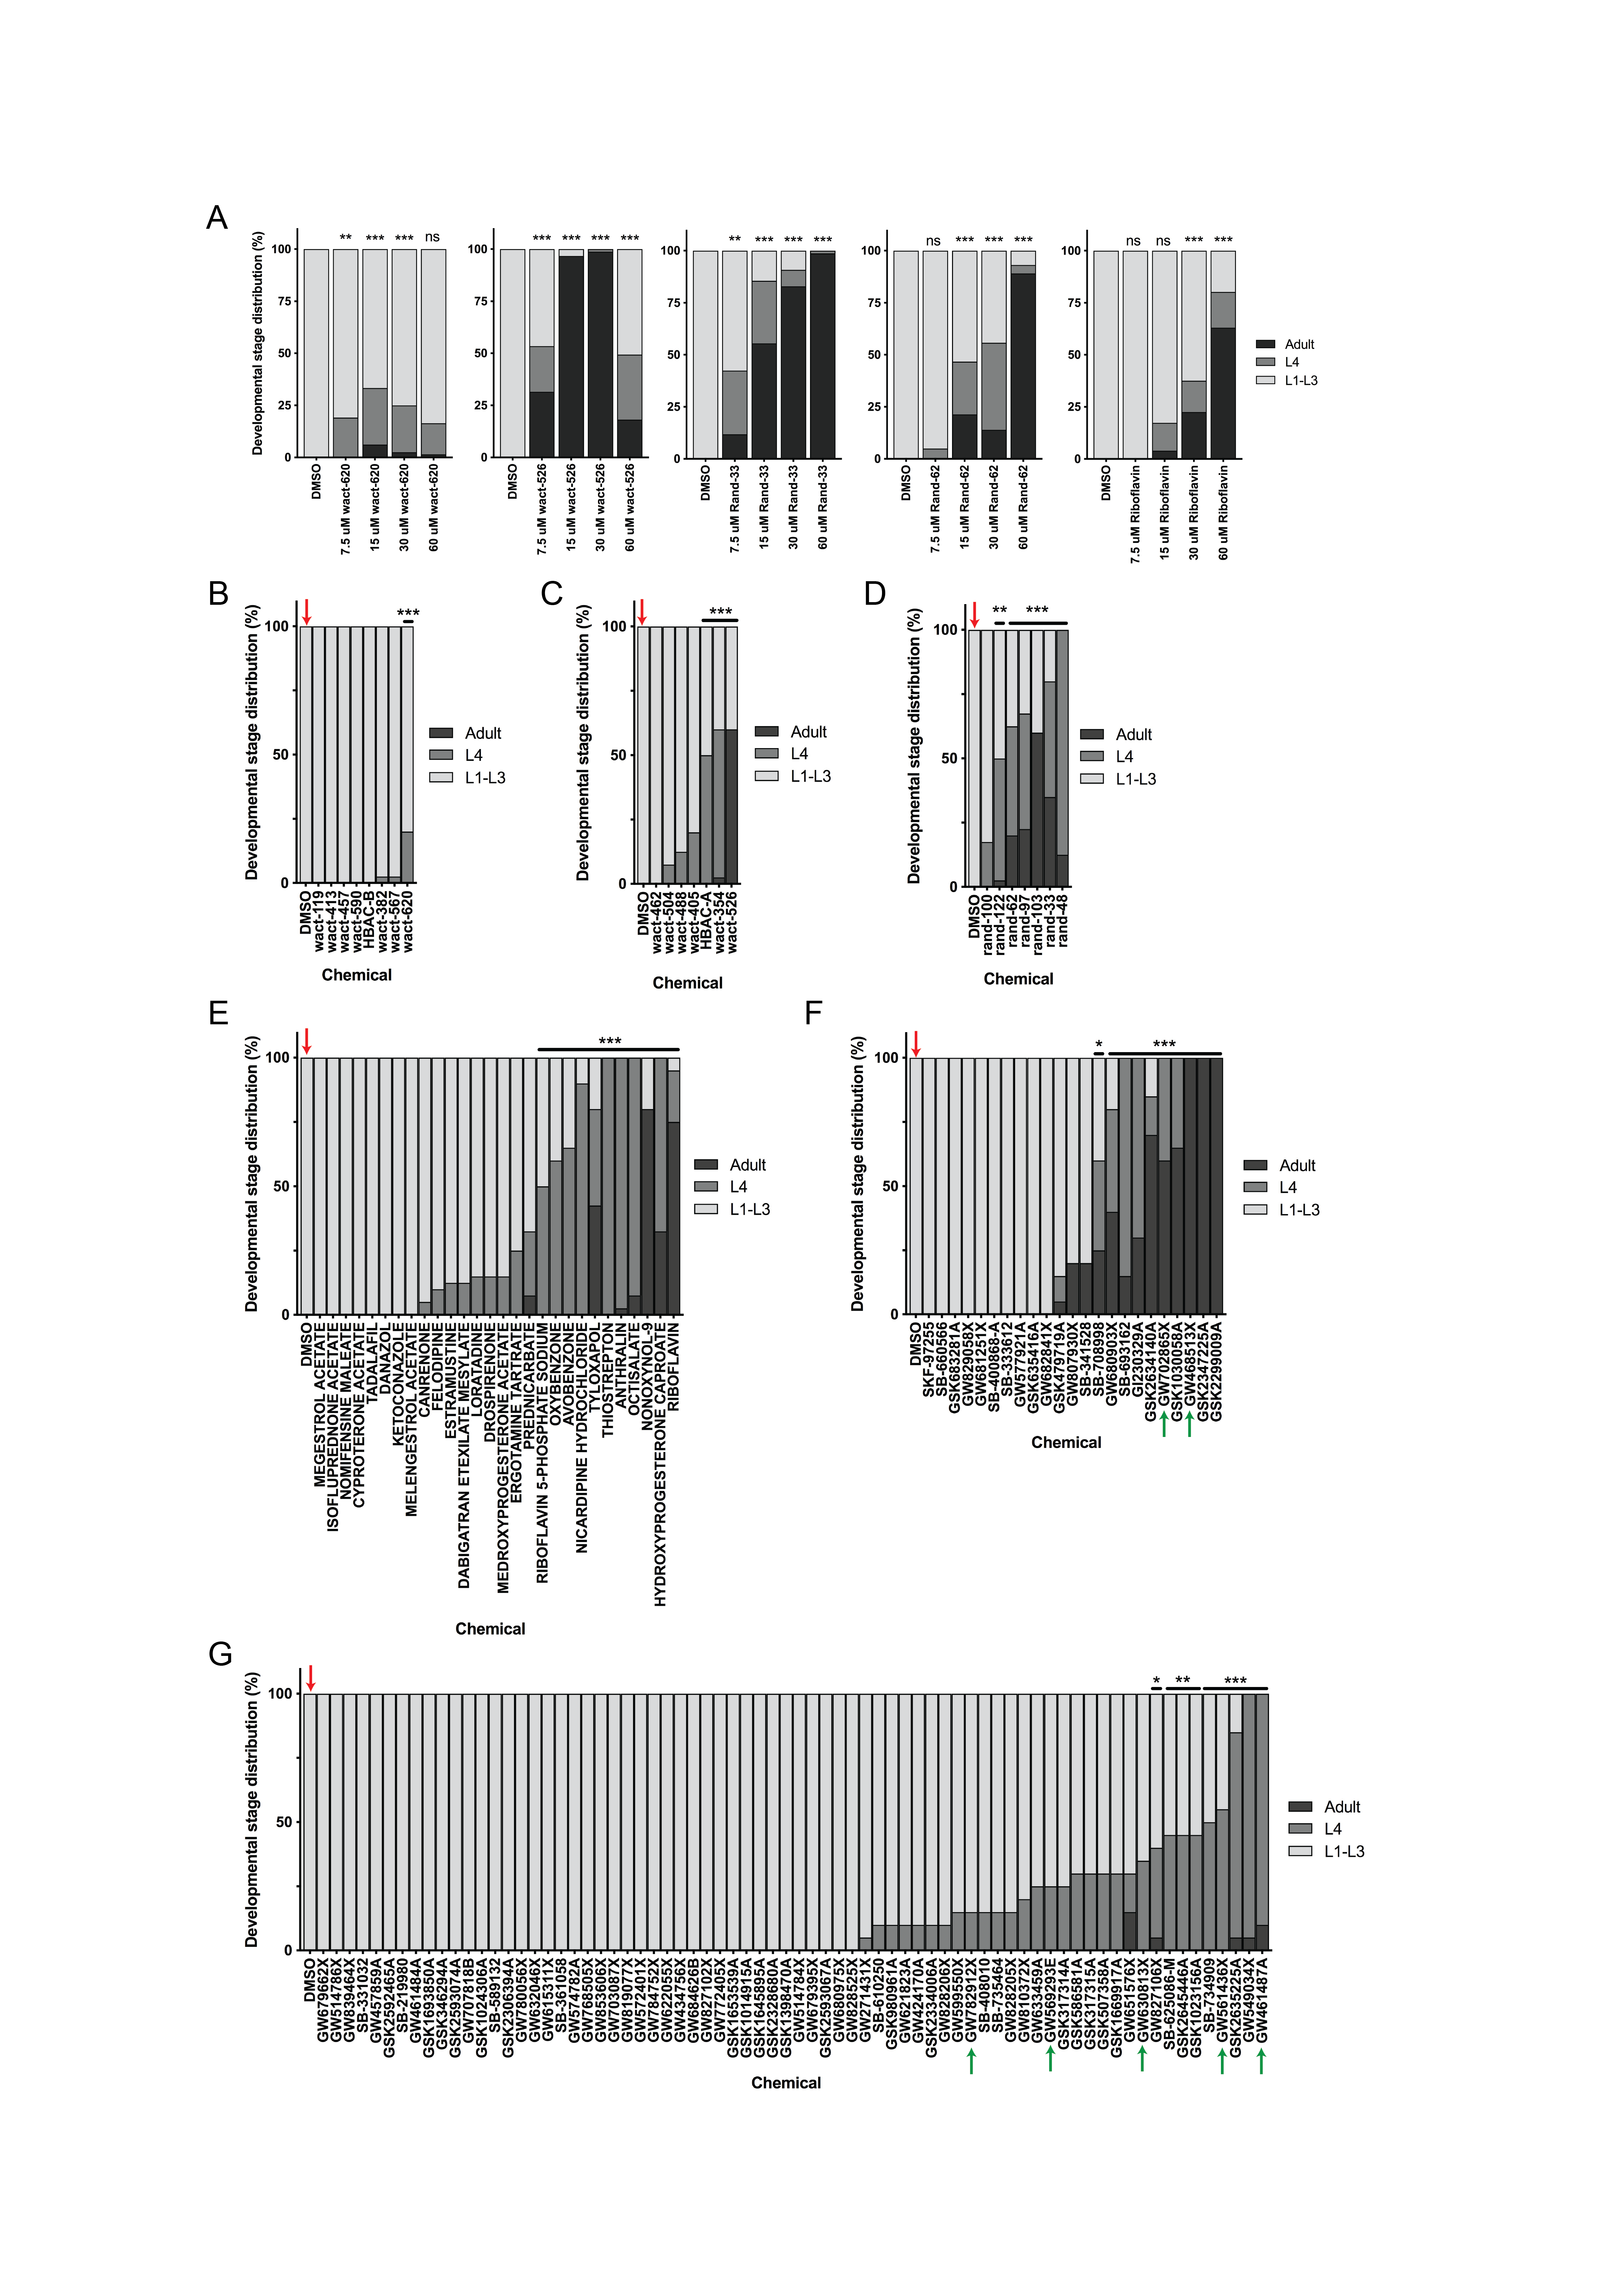

Supplement: supp [file elife-52946-supp-v1.zip › elife_poa_e52946_Figure_2_figure_supplement_4.png]

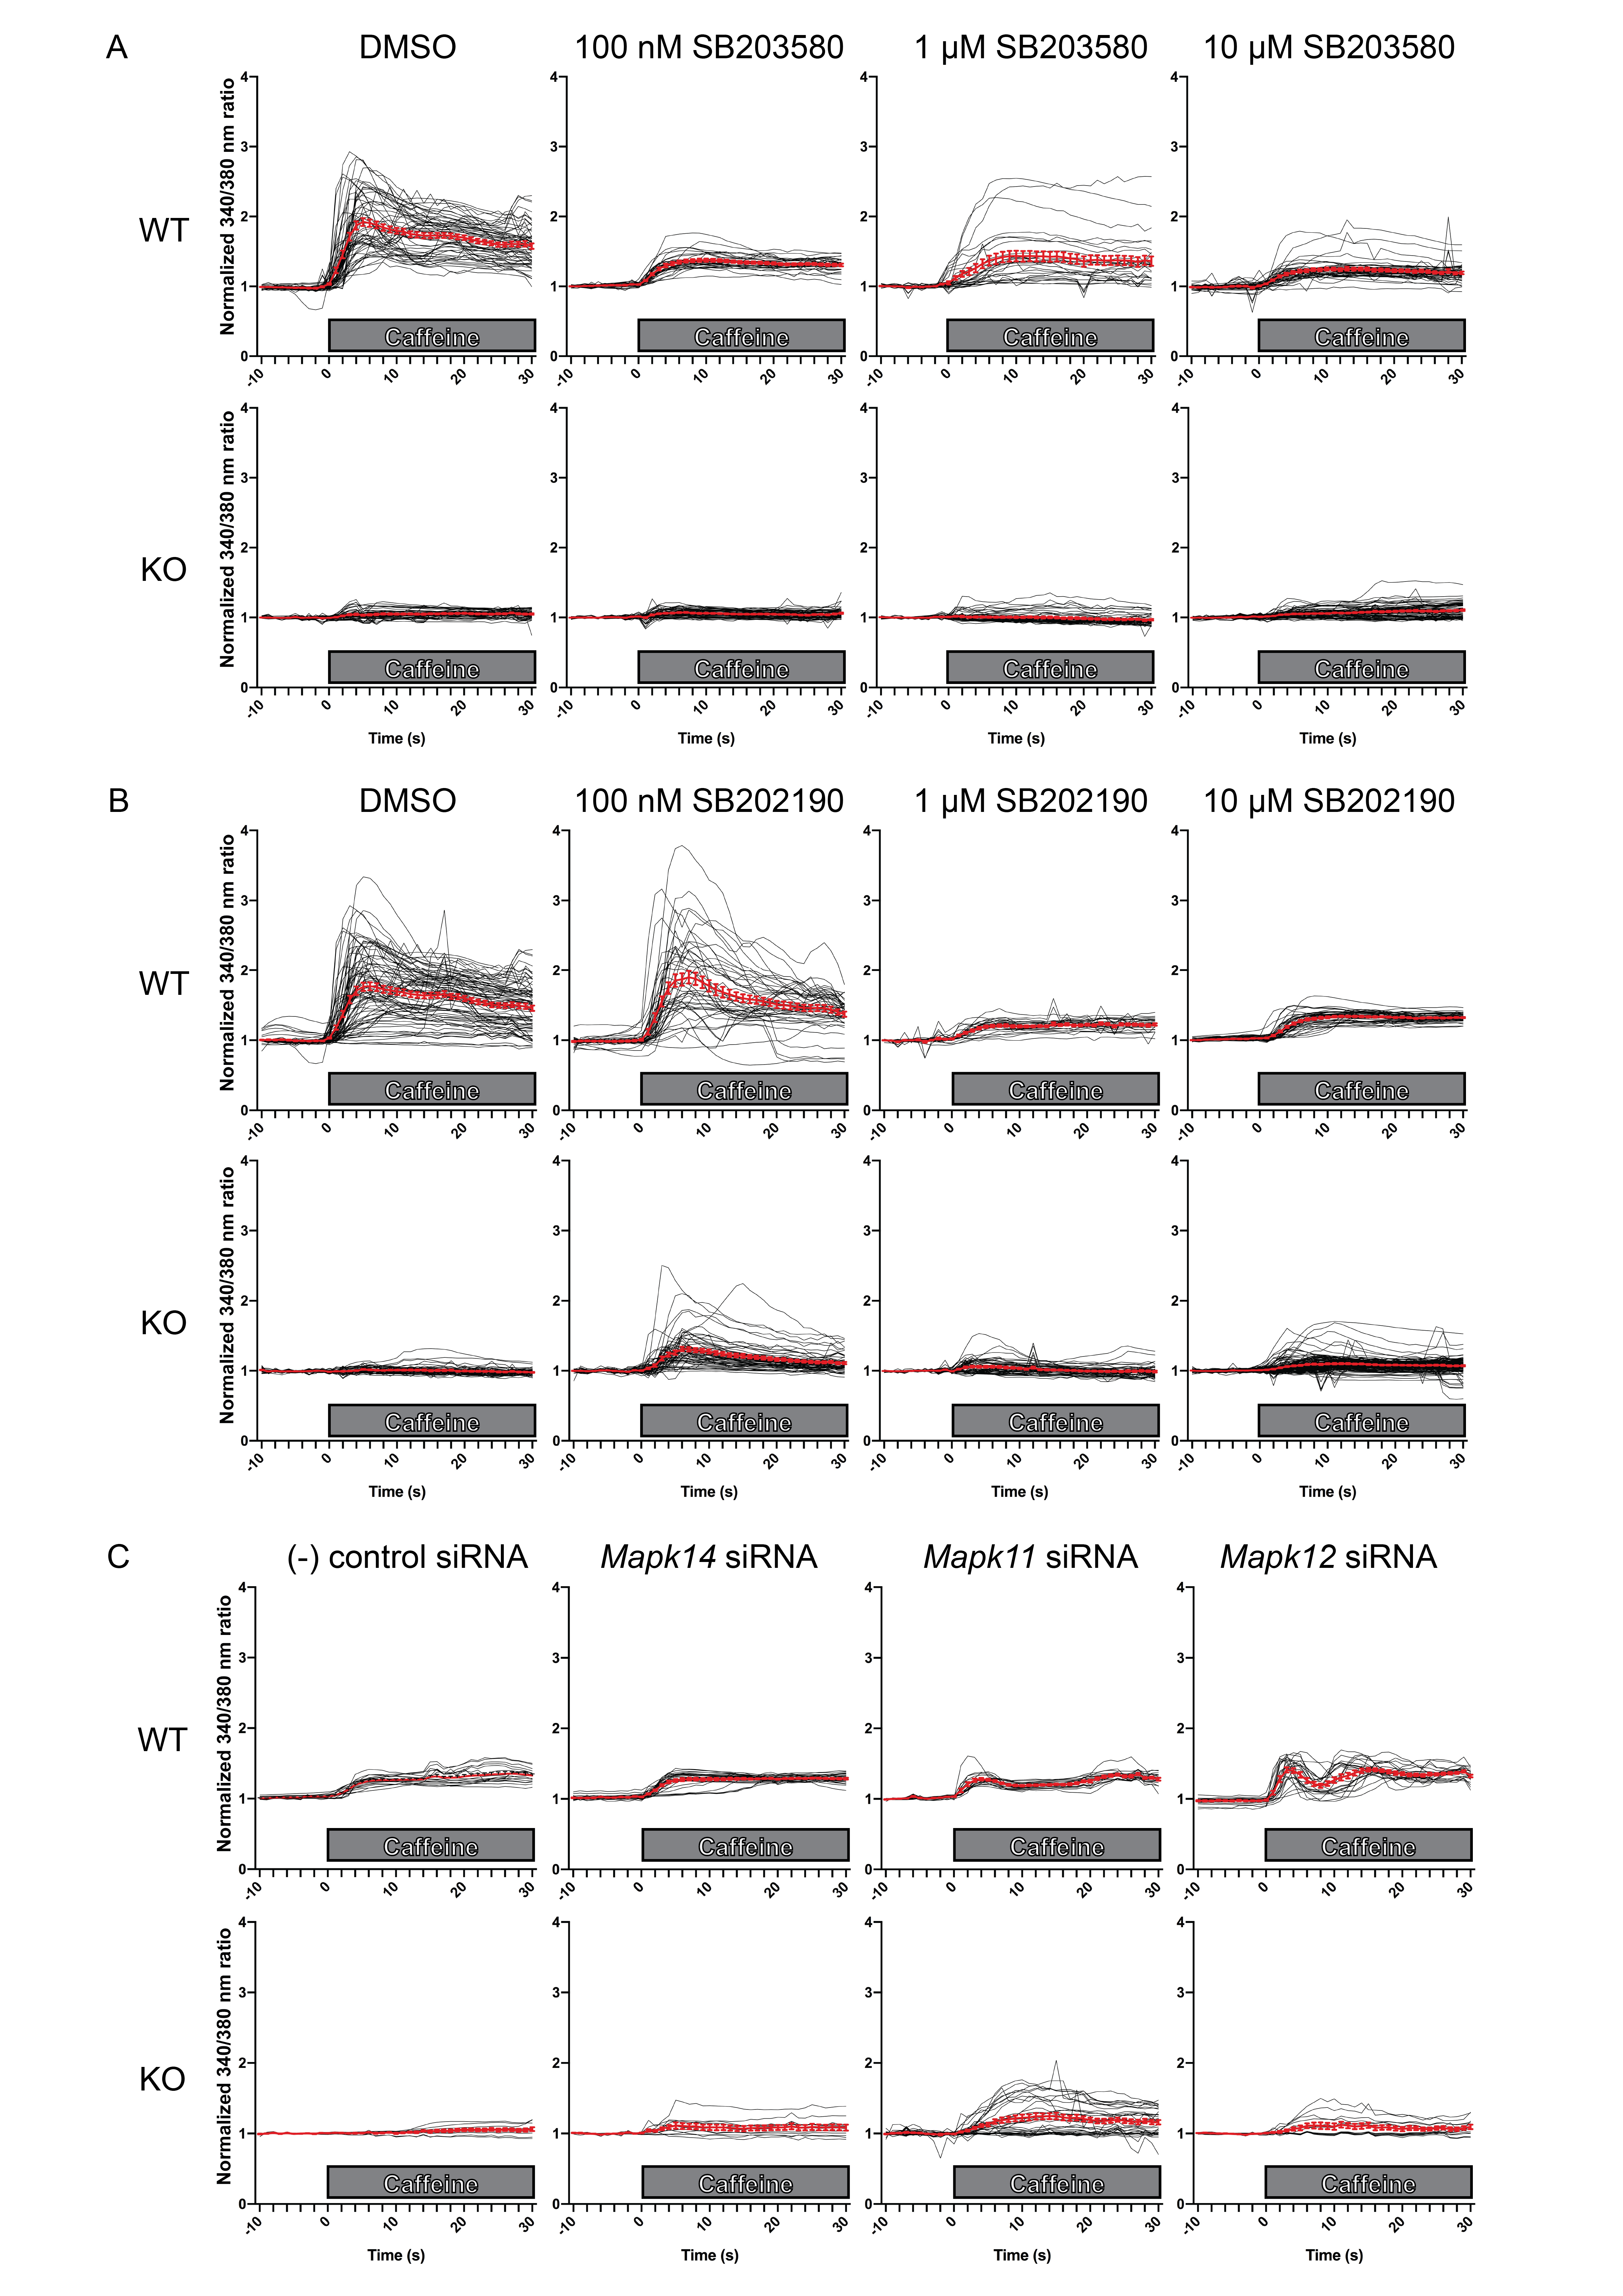

Supplement: supp [file elife-52946-supp-v1.zip › elife_poa_e52946_Figure_5_figure_supplement_3.png]

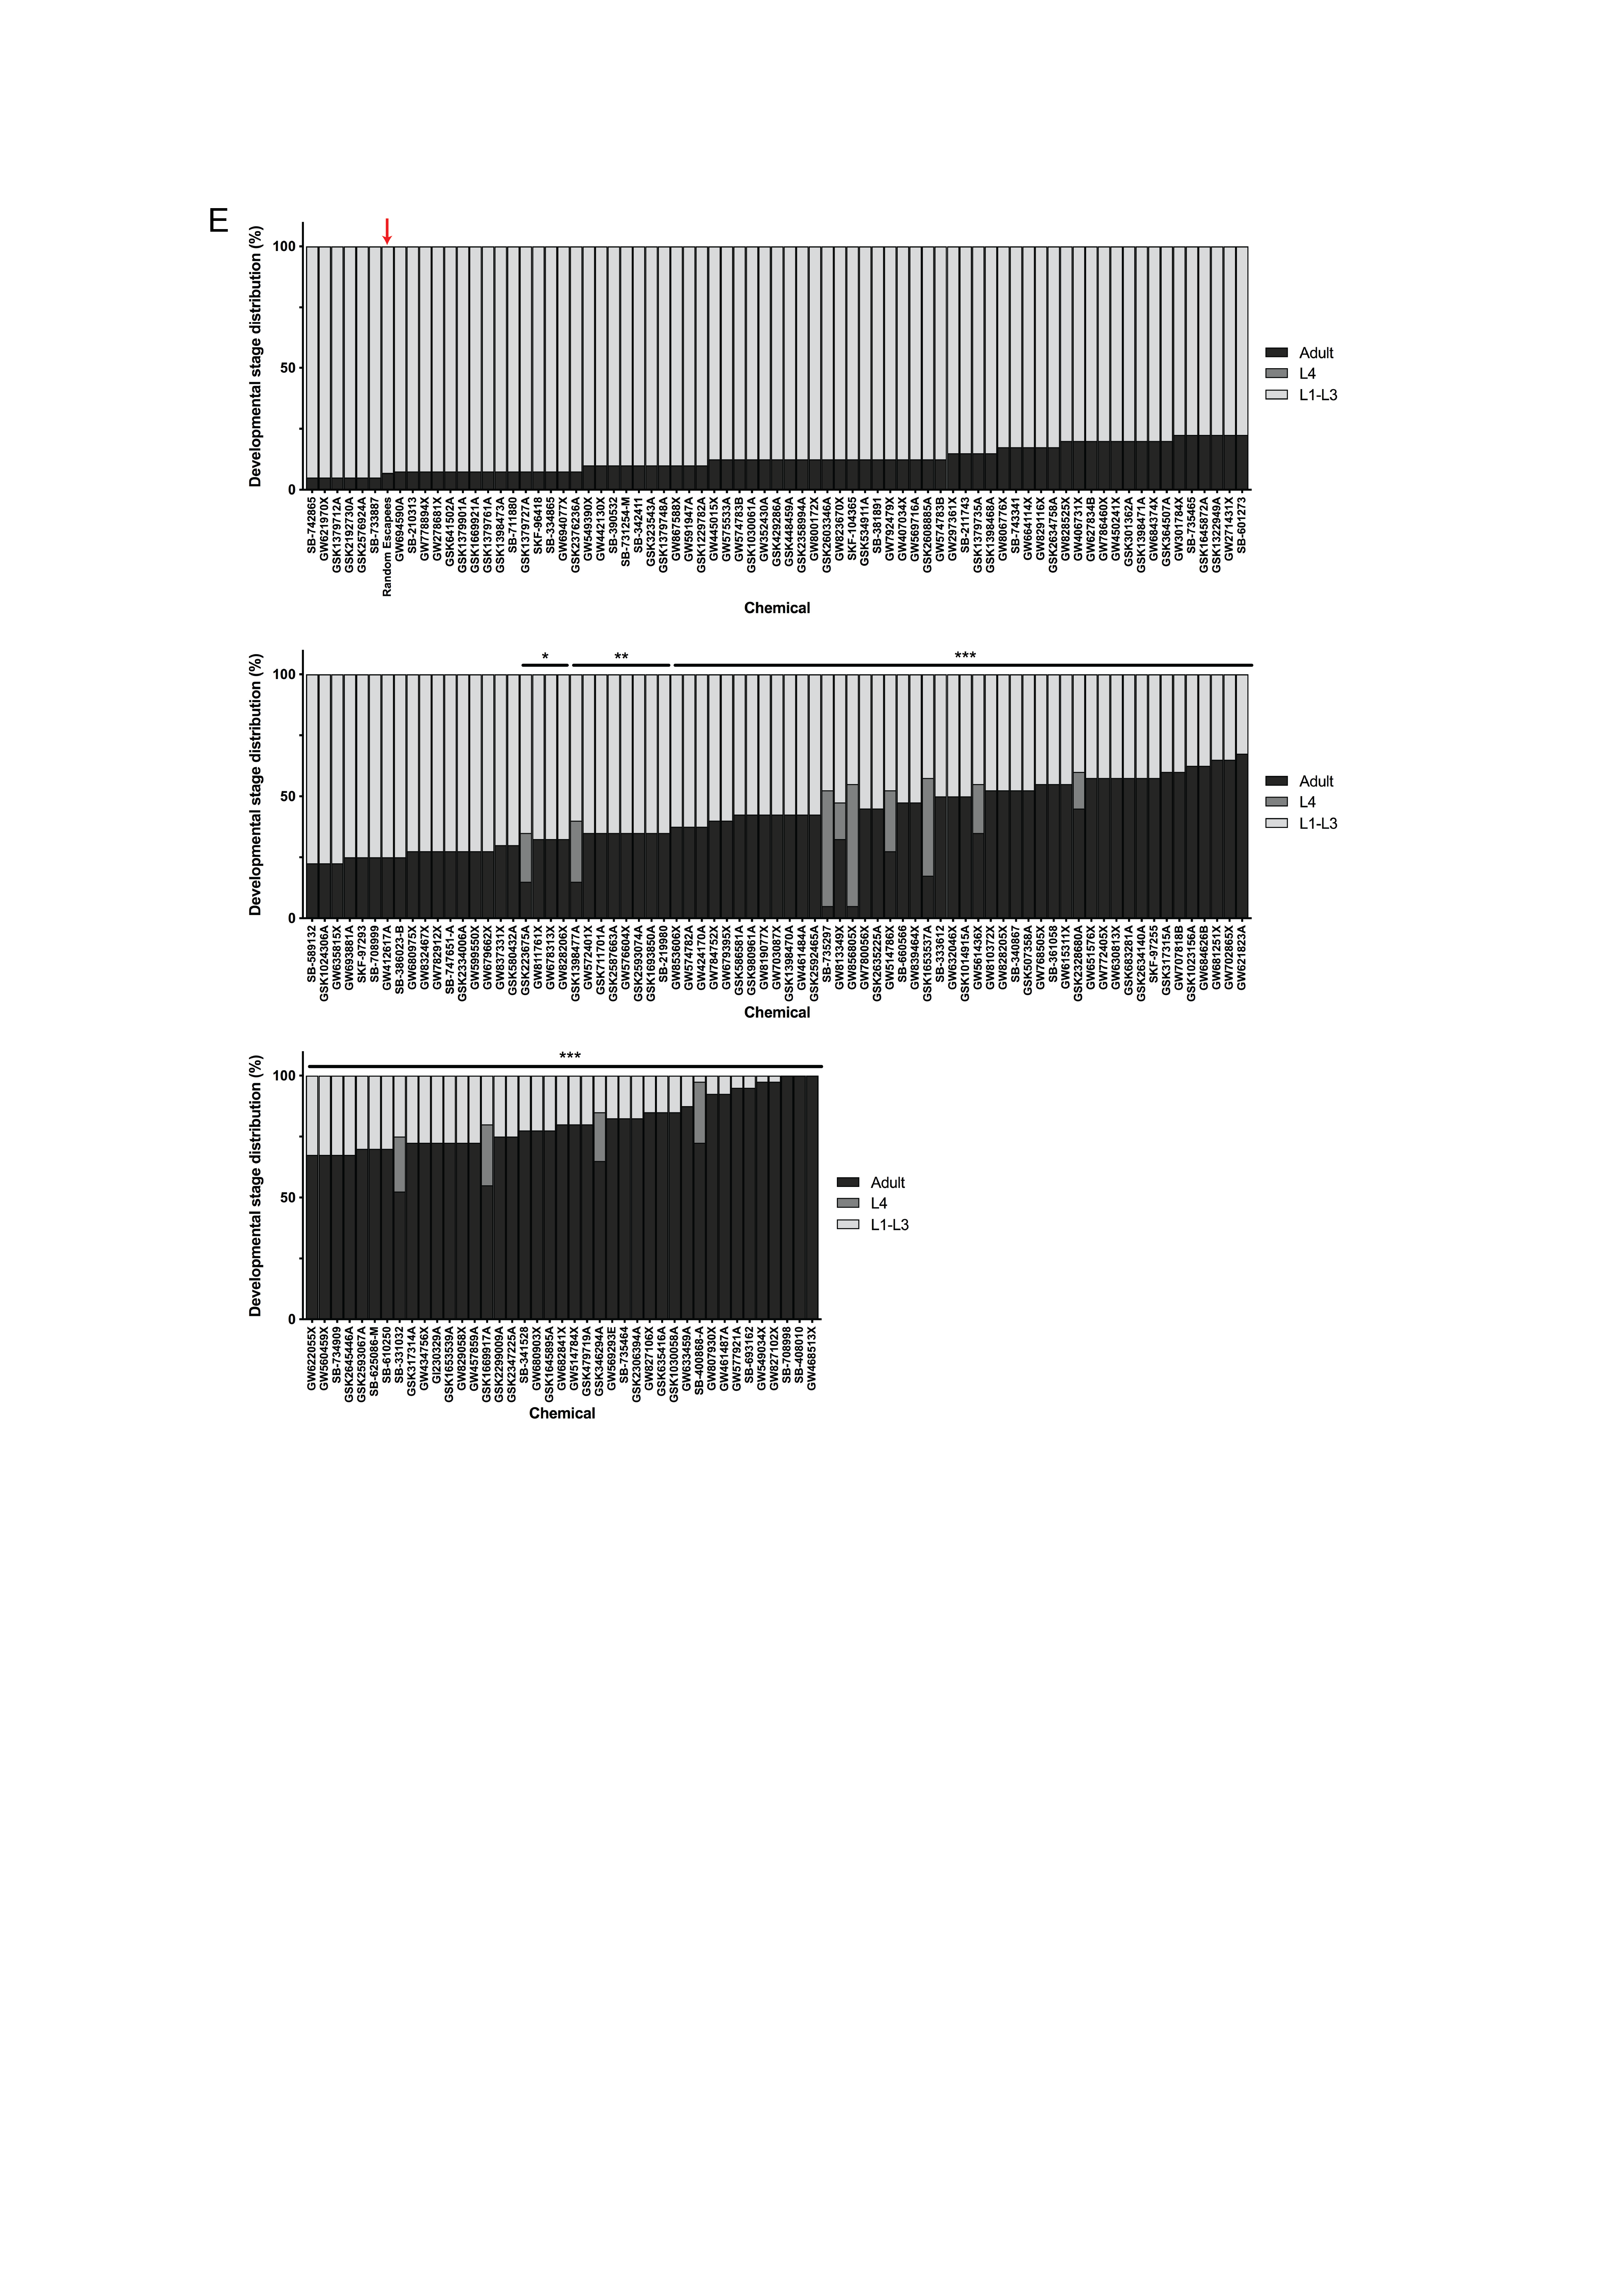

Supplement: supp [file elife-52946-supp-v1.zip › elife_poa_e52946_Figure_2_figure_supplement_3.png]

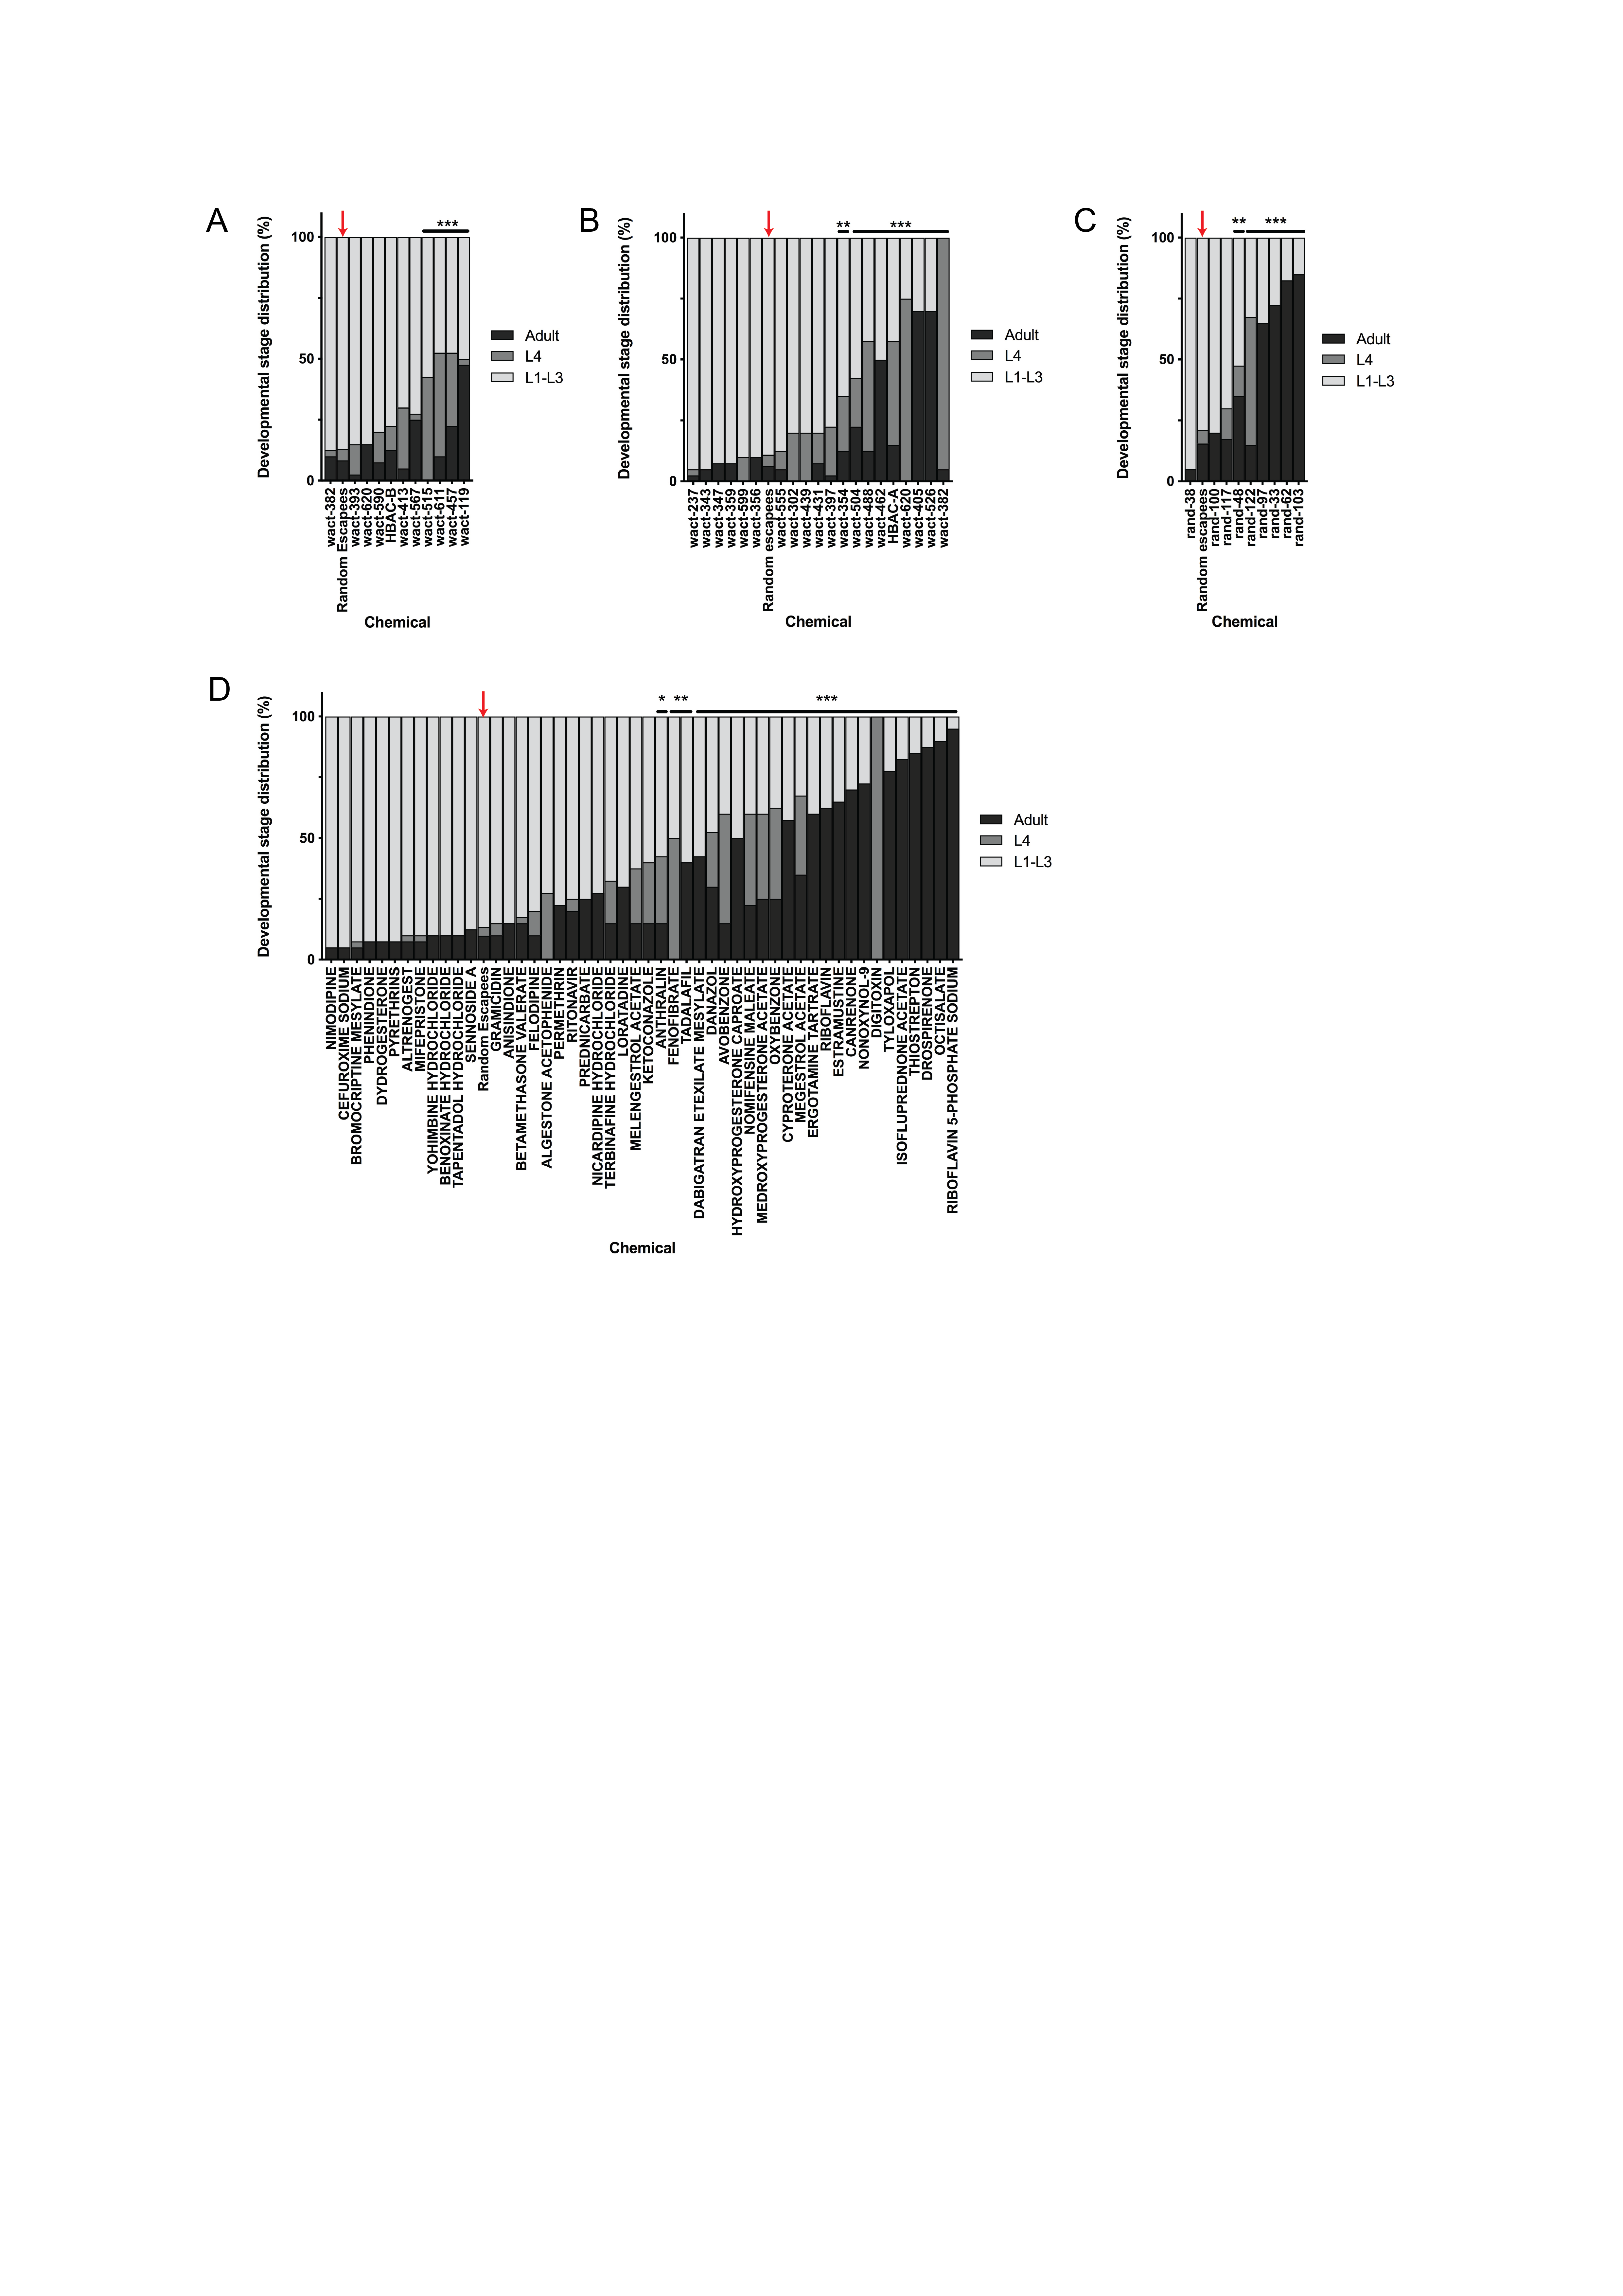

Supplement: supp [file elife-52946-supp-v1.zip › elife_poa_e52946_Figure_2_figure_supplement_2.png]

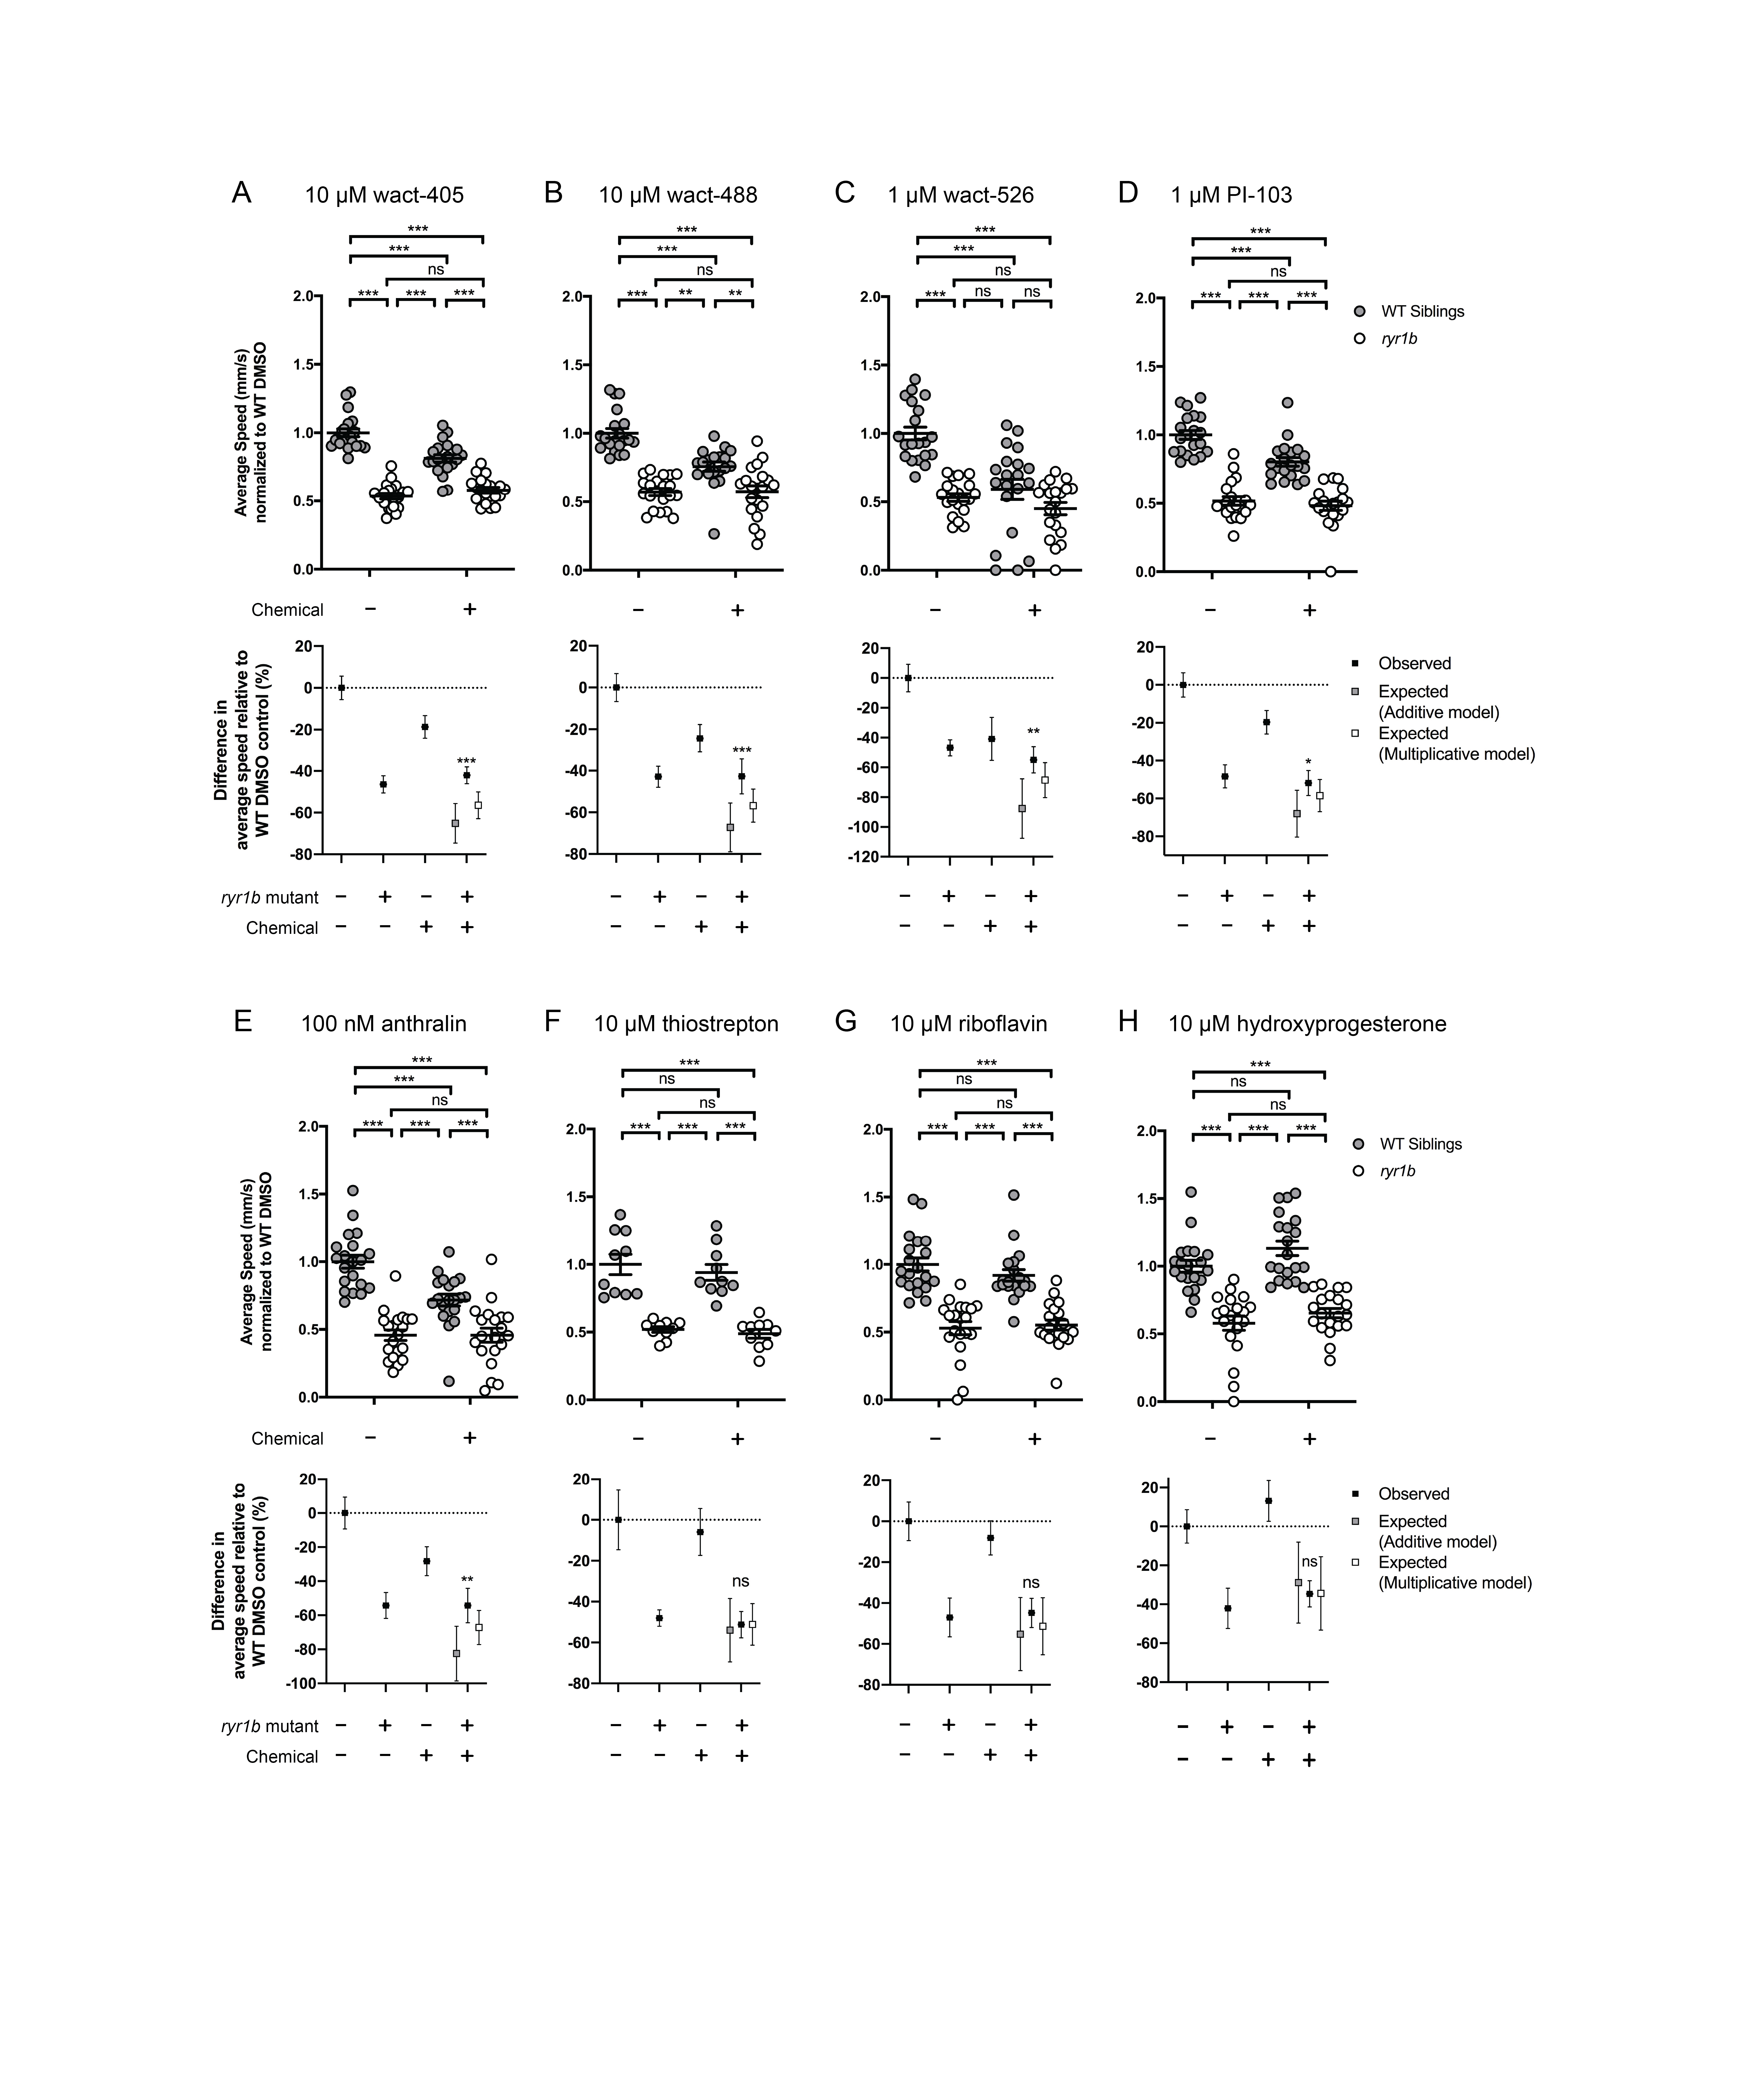

Supplement: supp [file elife-52946-supp-v1.zip › elife_poa_e52946_Figure_4_figure_supplement_1.png]

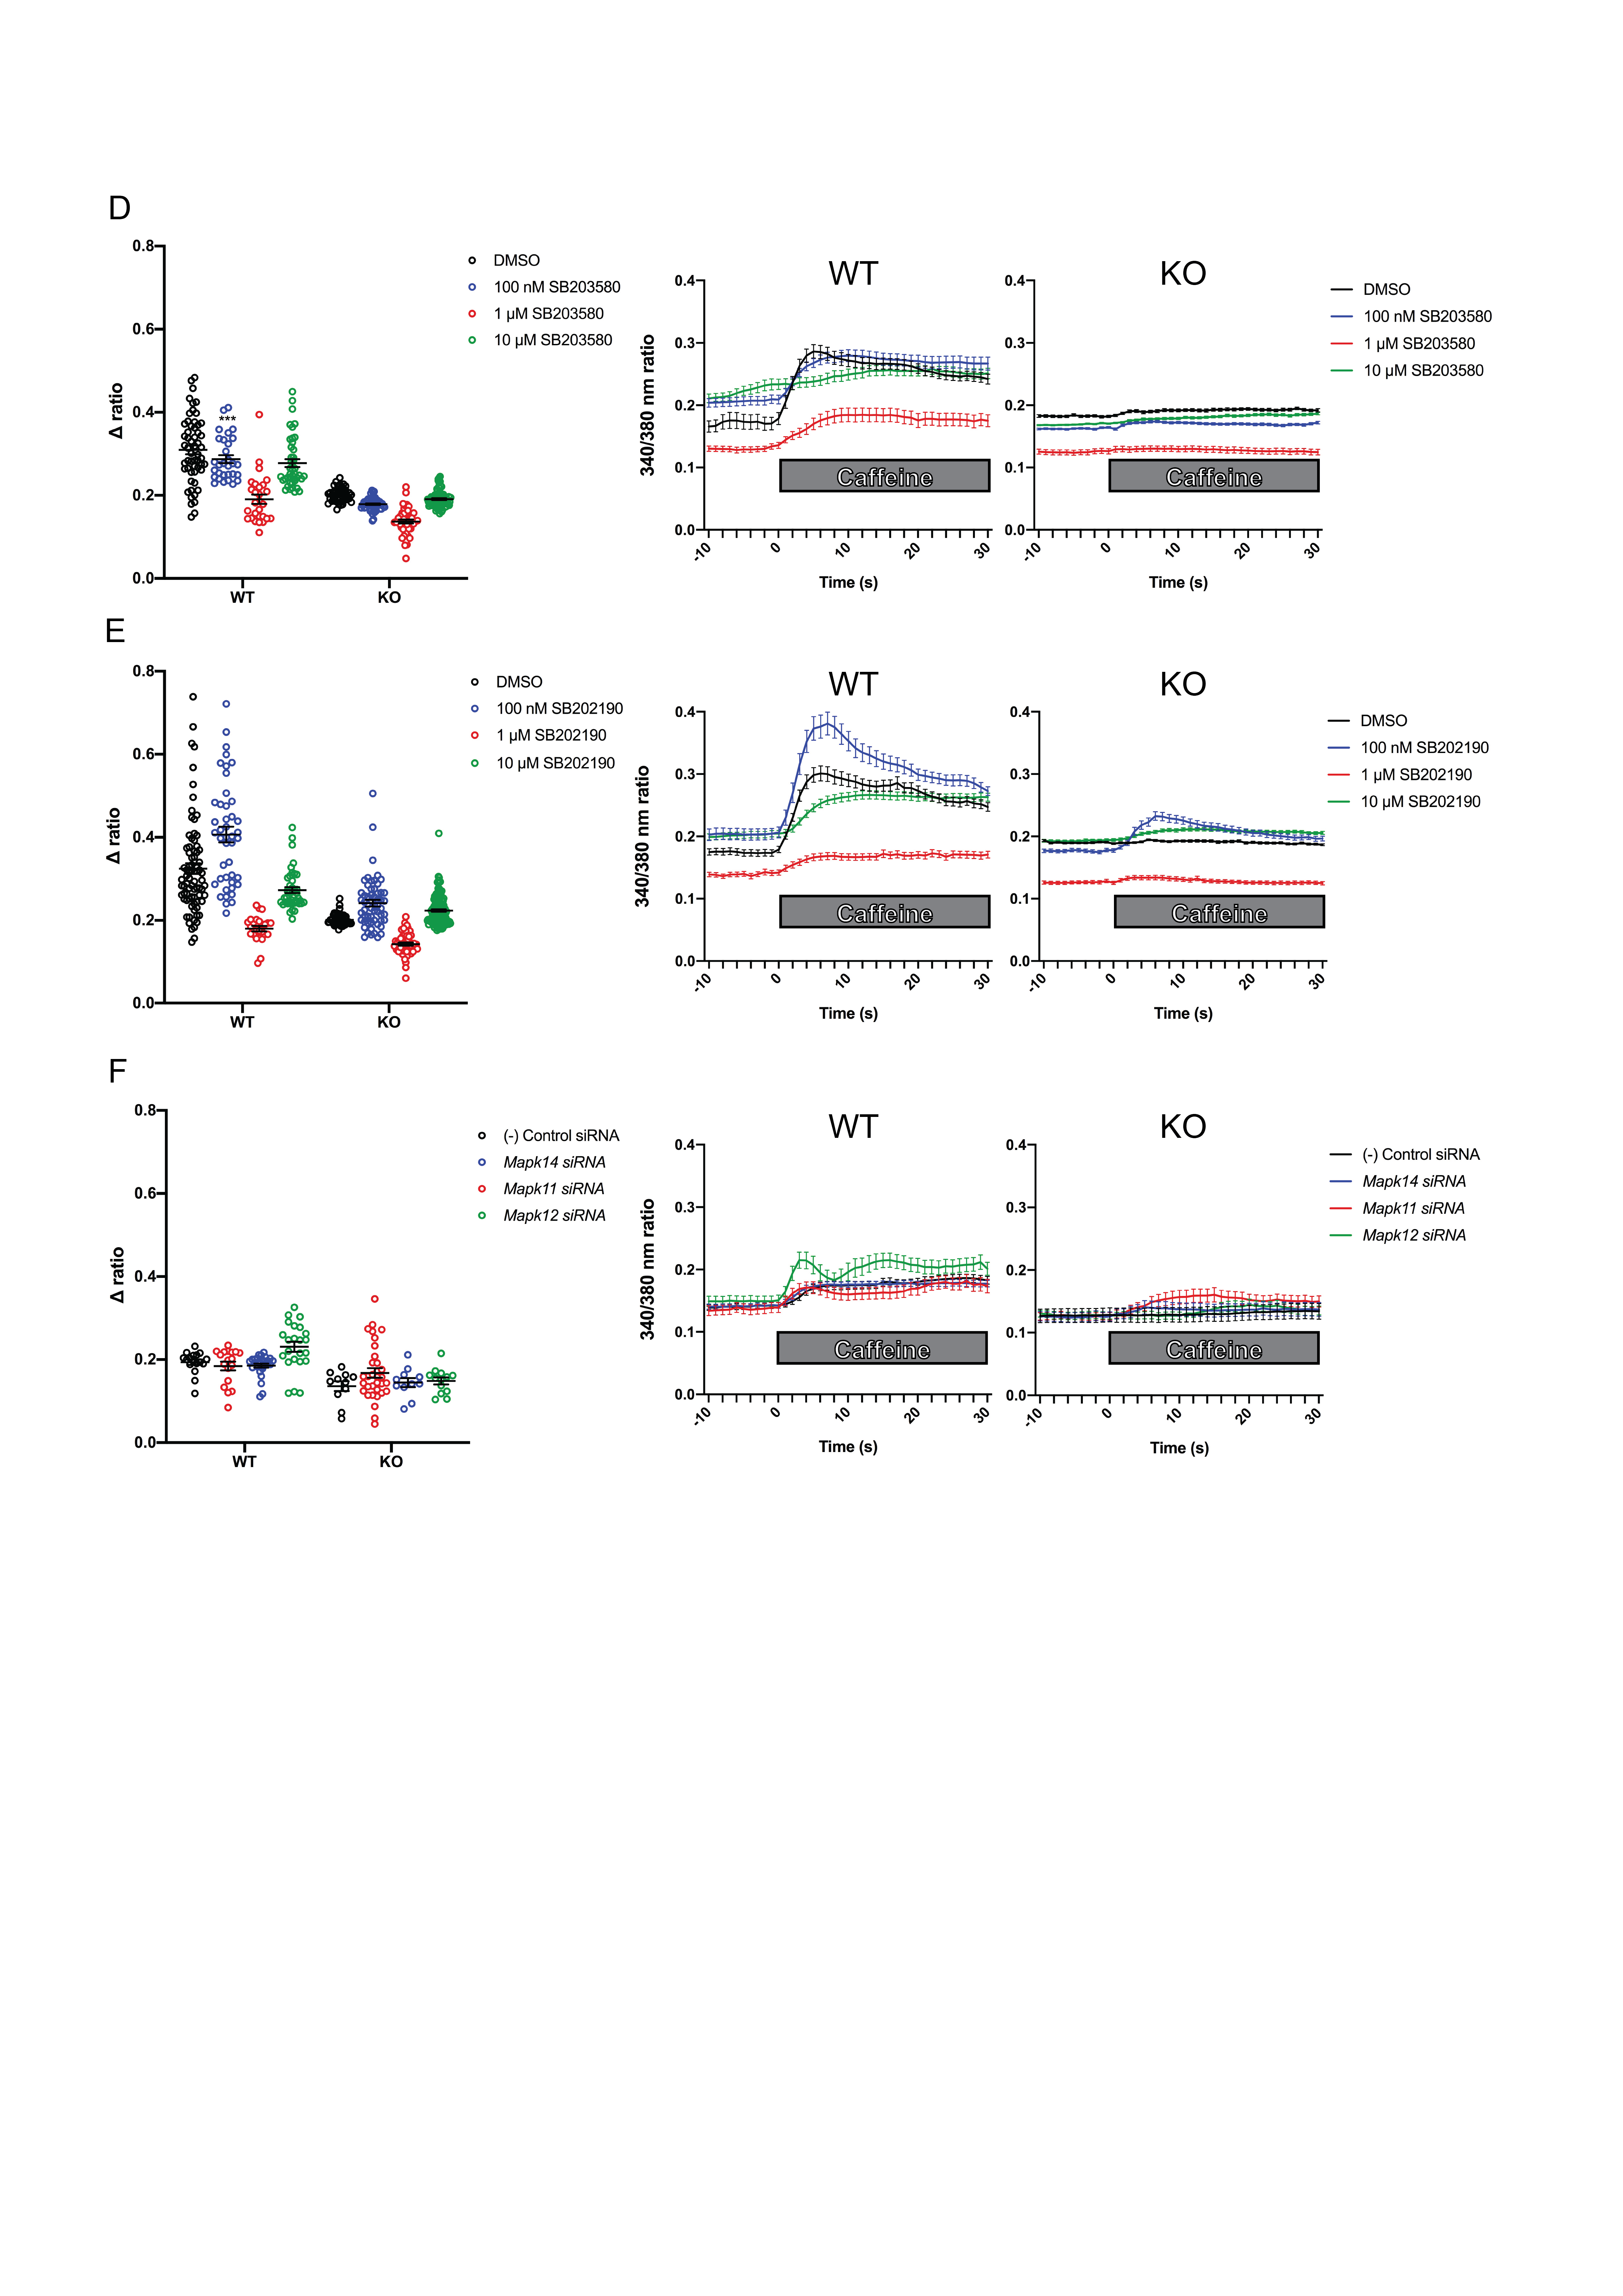

Supplement: supp [file elife-52946-supp-v1.zip › elife_poa_e52946_Figure_5_figure_supplement_4.png]

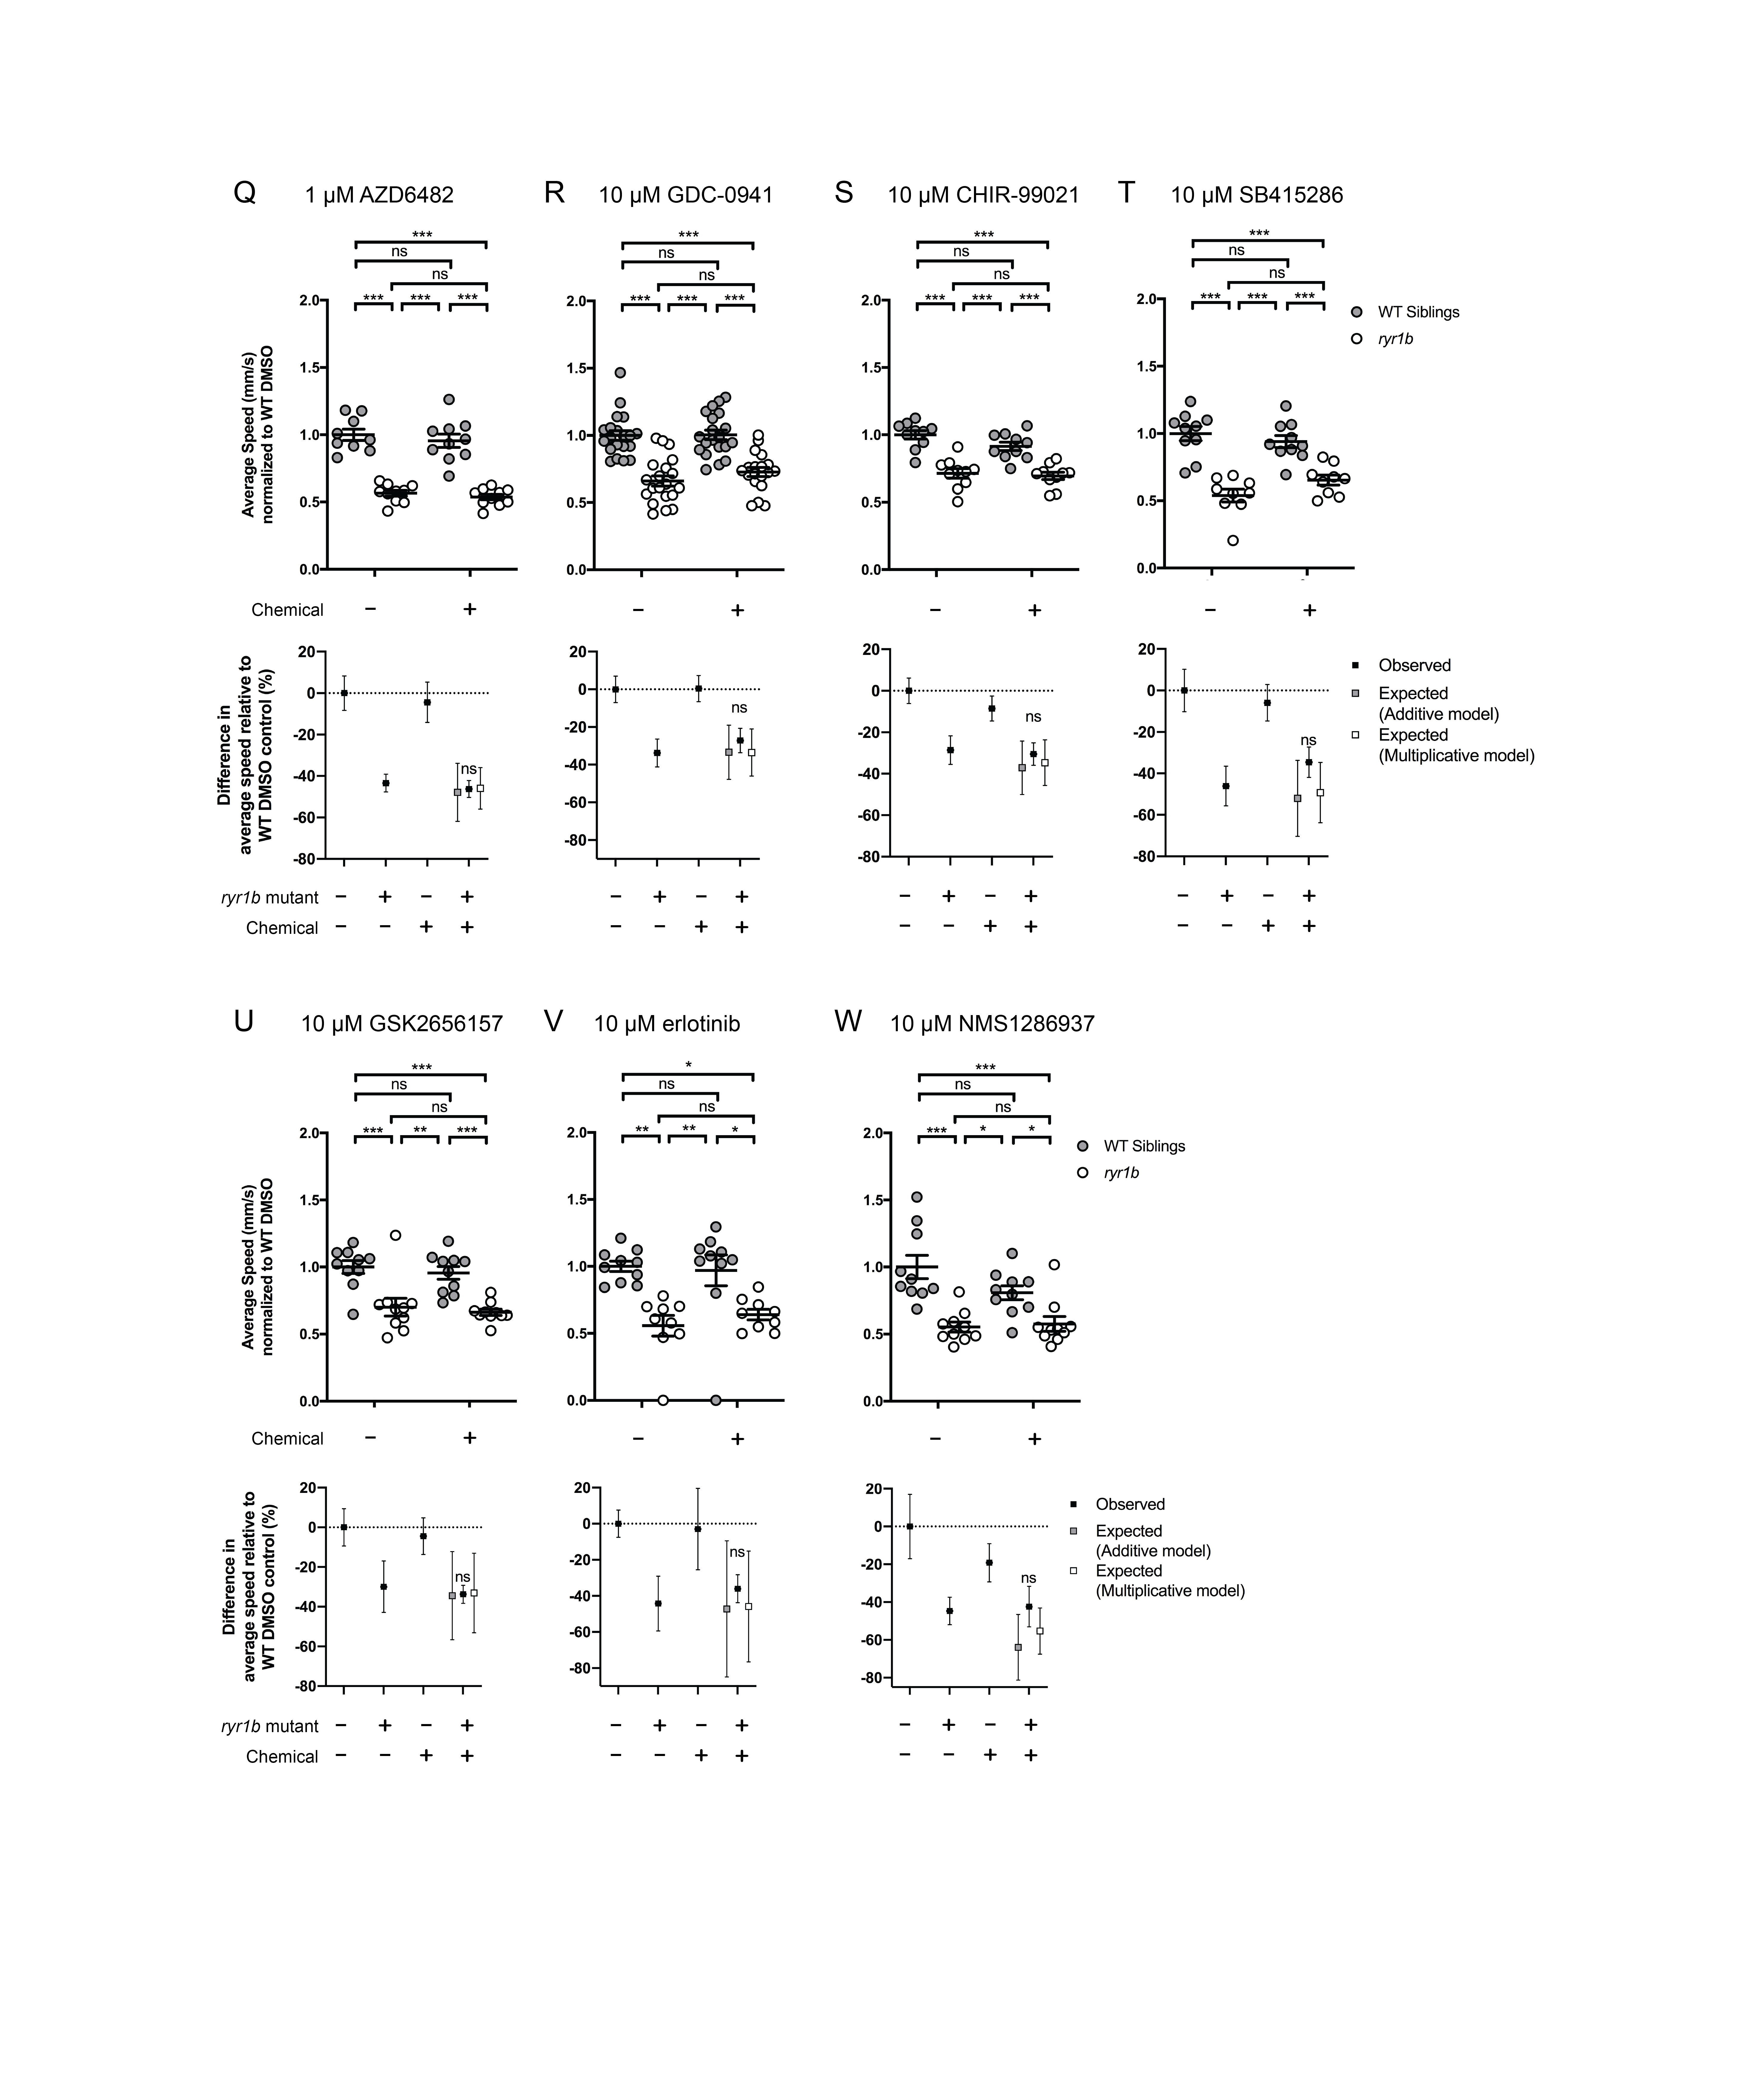

Supplement: supp [file elife-52946-supp-v1.zip › elife_poa_e52946_Figure_4_figure_supplement_3.png]
